1 **Patterns of phenotypic plasticity among populations of three Mediterranean**  
2 **pine species and implications for evolutionary responses to climate change**

3

4

5 **List of Authors**

6 Natalia Vizcaíno-Palomar<sup>1\*</sup>, Bruno Fady<sup>2</sup>, Ricardo Alía<sup>3</sup>, Annie Raffin<sup>4</sup>, Sven Mutke<sup>3</sup>, Marta Benito  
7 Garzón<sup>1</sup>

8

9 **Institutional affiliations**

10 <sup>1</sup> BIOGECO, INRA, Univ. Bordeaux, 33615 Pessac, France

11 <sup>2</sup> INRA Unité de Recherches Ecologie des Forêts Méditerranéennes (URFM), Avignon,  
12 France

13 <sup>3</sup> INIA, Forest Research Centre & iuFOR UVa-INIA, Ctra La Coruña km 7.5, 28040  
14 Madrid – Spain

15 <sup>4</sup> INRA Unité Expérimentale Forêt Pierroton (UEFP), 33610 Cestas, France

16

17 \* corresponding email's author: [natalia.vizcaino.palomar@gmail.com](mailto:natalia.vizcaino.palomar@gmail.com)

18 Contact Information: [natalia.vizcaino.palomar@gmail.com](mailto:natalia.vizcaino.palomar@gmail.com),

19 [ORCID ID 0000-0002-3481-7567](https://orcid.org/0000-0002-3481-7567)

20 **Abstract**

21 **Aim:** Under rapid environmental change, phenotypic plasticity, if adaptive, could increase the odds  
22 for organisms to persist. Environmental variation over time is an important source of phenotypic  
23 plasticity. Likewise, phenotypic plasticity can vary with age in many organisms. However, little is  
24 known on phenotypic plasticity variation across species' ranges. Our aims are: (i) to assess whether  
25 populations' phenotypic plasticity is related to the inter-annual climate variation under which  
26 populations have evolved during the last century; (ii) to compare phenotypic plasticity among  
27 developmental classes; and (iii) to predict phenotypic plasticity across' species ranges.

28 **Location:** Europe and North-Africa.

29 **Time period:** 1901-2014.

30 **Major taxa studied:** *Pinus nigra*, *P. pinaster* and *P. pinea*.

31 **Methods:** We used 372 646 individual tree height measurements at three developmental classes  
32 from a wide network of 38 common gardens in Europe and North Africa with provenances covering  
33 the distribution range of the species. With this data, we: i) build linear mixed-effect models of tree  
34 height as a function of tree age, population and climate; ii) estimate populations' reaction norms  
35 from the fitted models; iii) calculate populations' phenotypic plasticity indexes; iv) build models of  
36 populations' phenotypic plasticity indexes as a function of inter-annual climate variation during the  
37 last century.

38 **Results:** We found that i) most populations that have evolved under high inter-annual climate  
39 variation, in either maximum or minimum values in temperature or precipitation, exhibited high  
40 values of plasticity in tree height; ii) phenotypic plasticity for tree height was higher in young trees  
41 than in older ones, iii) phenotypic plasticity did not follow any particular geographical pattern  
42 across species' ranges.

43 **Main conclusions:** Phenotypic plasticity across the three Mediterranean pines' ranges is related  
44 with the climate variation experienced over time and calls into question whether this plasticity could  
45 be adaptive and hence beneficial to cope with climate change in the short-term.

46 **Keywords:** Acclimation, Black pine, Climate change, Developmental stage, Inter-annual climate  
47 variation, Maritime pine, Mixed-effect models, Stone pine.

## 48 **Introduction**

49 Climate change is reshuffling species distribution ranges from marine to terrestrial systems, altering  
50 current ecosystems functioning and structure through disruption of species interactions at temporal  
51 and/or spatial scales (Lenoir *et al.*, 2008; Poloczanska *et al.*, 2013). To survive under new climates,  
52 organisms can move to more favorable environments (Chen *et al.*, 2011; Sunday *et al.*, 2011), or  
53 persist *in-situ* by changes in their genetic composition or adjusting to environmental changes using  
54 phenotypic plasticity (West-Eberhard, 2003; Pulido & Berthold, 2004). Evolutionary responses to  
55 climate change will imply changes in allele frequencies that need many generations to arise  
56 (Bradshaw & Holzapfel, 2001; Reale *et al.*, 2003; Franks *et al.*, 2007), whereas plastic responses  
57 can occur without changes in the genetic structure (Sultan, 2000; Valladares *et al.*, 2014) within one  
58 generation (or even longer when including trans-generational effects, Donelson *et al.*, (2018)).  
59 Thus, phenotypic plasticity can provide a rapid response, whereas evolutionary responses need  
60 longer time depending on the lifespan of organisms. For the particular case of trees, with very long  
61 generation times and large gene flow among populations, genetic adaptation occurs at long time  
62 scales (Savolainen *et al.*, 2007). For example, evolutionary adjustments to match new climates  
63 could need more than 1500 years in *Pinus sylvestris* (Rehfeldt *et al.*, 2002). Therefore, plasticity is  
64 often the main mechanism for tree populations to respond *in-situ* to rapid climate change (Benito  
65 Garzón *et al.*, 2019).

66 Environmental variation, either spatial or temporal, may promote differentiation in phenotypic  
67 plasticity among populations (Vizcaíno-Palomar *et al.*, 2016). In this context, some studies have  
68 shown that more plastic genotypes are promoted under greater heterogeneity (Lind & Johansson,  
69 2007; Canale & Henry, 2010; Baythavong, 2011; Lázaro-Nogal *et al.*, 2015). However, phenotypic  
70 plasticity may not be always advantageous, and sometimes it can be detrimental. For example, high  
71 values of plasticity can be associated with low values of fitness-related traits as survival, biomass,  
72 or reproduction (e.g. Sánchez-Gómez *et al.*, (2006); Molina-Montenegro & Naya, (2012)).  
73 Likewise, changes in plasticity can occur during the lifespan of organisms due to morphological and  
74 physiological adjustments to the environment (Evans, 1972; Coleman *et al.*, 1994; Mitchell &  
75 Bakker, 2014). Hence, we could expect to find differences in phenotypic plasticity for fitness-  
76 related traits between early and mature stages of development (Mediavilla & Escudero, 2004). For  
77 instance, we can expect high plasticity in seedlings that present small root systems located in the  
78 shallow soil layers with great variation in soil moisture in contrast to mature trees with deep root  
79 systems reaching to more stable layers of soil moisture over the year. Hence, greater plasticity at the  
80 recruitment stage could be favorable for plant establishment in the community. Taken altogether,  
81 we could expect that phenotypic plasticity can vary across the species' distribution ranges and  
82 within-species lifespan.

83           The complex topography and orography of the Mediterranean basin, with its inter and  
84 intra-seasonal climate variation, and its recent story of species' expansions from refugia after the  
85 Last Glacial Maximum could have promoted differentiation in phenotypic plasticity among  
86 populations across species' ranges (Médail & Diadema, 2009). As a result, Mediterranean pine  
87 species present patchy distributions with differentiated patterns of genetic diversity and local  
88 adaptation, reviewed in Fady, (2012). For instance, although *P. nigra* has a larger distribution than  
89 *P. pinaster*, both present moderate-high population differentiation in neutral genetic diversity (Soto  
90 *et al.*, 2010) and in quantitative traits, such as tree height, diameter, height-diameter allometry,  
91 survival, etc. (Varelides *et al.*, 2001; Taïbi *et al.*, 2016; Vizcaíno-Palomar *et al.*, 2016). On the  
92 contrary, *P. pinea* presents very low levels in genetic diversity across its range (Vendramin *et al.*,  
93 2008), as well as low differentiation for quantitative traits, such as in tree height (Mutke *et al.*,  
94 2010, 2013; Sánchez-Gómez *et al.*, 2011).

95           Assessing populations' phenotypic plasticity responses across the species' ranges  
96 requires the use of phenotypic data measured from multiple common gardens, ideally a minimum of  
97 three (Arnold *et al.*, 2019), installed across large environmental gradients in which a suite of  
98 populations from varied origins are planted. These experimental designs permit to fit populations'  
99 non-linear phenotypic responses to the environment, known as 'reaction norm' curves (Gavrilets &  
100 Scheiner, 1993; Schlichting & Pigliucci, 1998), from which quantifying populations' phenotypic  
101 plasticity is straightforward (Arnold *et al.*, 2019). Furthermore, populations' phenotypic responses  
102 can be used to quantify populations' phenotypic plasticity using indices (Valladares *et al.*, 2006).

103           In this study, we used tree height, a fitness-related trait (King, 1990; Savolainen *et al.*,  
104 2007), measured in a wide network of common gardens established in Europe and North Africa for  
105 *Pinus nigra*, *P. pinaster* and *P. pinea* (Vizcaíno-Palomar *et al.*, 2019). We fitted linear mixed-effect  
106 models of tree height to: i) assess whether populations' phenotypic plasticity is related to the inter-  
107 annual climate variation under which populations have evolved during the last century; ii) compare  
108 phenotypic plasticity among developmental classes; iii) predict phenotypic plasticity across species  
109 ranges.

## 110 **Material and methods**

### 111 **Provenance trials, species and phenotypic data**

112 We used tree height recorded in common garden networks for three pine species: *Pinus nigra* Arn.,  
113 *P. pinaster* Aiton and *P. pinea* L. (see Figure S1 in Supporting Information). For *Pinus nigra*, we  
114 used 192 221 measurements of individual tree height recorded in 15 trials distributed across three  
115 countries (France, Germany and Spain) where 78 populations (provenances) from origins covering  
116 the entire range of the species were planted. Trials were planted between years 1968 and 2009 and  
117 tree heights were measured between 2 and 18 year-old. For *P. pinaster* we used 123 801  
118 measurements of individual tree height recorded in 14 trials established across three countries  
119 (France, Morocco and Spain) and 182 populations covering the entire range of the species. Trials  
120 were installed between years 1966 and 1992 and tree heights were measured between 2 and 34 year-  
121 old. For *P. pinea*, we used 56 624 measurements of individual tree height recorded in 9 trials  
122 established in France and Spain, where a total 55 populations covering the entire range of the  
123 species were planted. Trials were established between years 1993 and 1997, and tree heights were  
124 measured between 2 and 22 year-old. Further description of these databases can be found in  
125 Vizcaíno-Palomar *et al.*, (2019).

126 To analyse the effect of age on phenotypic plasticity we defined three developmental  
127 classes (DC. 1, DC. 2 and DC. 3) covering the range of ages of each species. In all species, DC.1  
128 included information for 4 year-old trees, DC.2 included trees of 8, 13, and 9 year-old, and DC.3  
129 included information for 14, 24, and 22 year-old trees, for *P. nigra*, *P. pinaster* and *P. pinea*,  
130 respectively.

131

### 132 **Climate data**

133 We used the EuMedClim dataset that provides annual measurements between 1901 and 2014, at 30  
134 arc-seconds (~ 1km) of resolution (<http://gentree.data.inra.fr/climate/datasets/>; Fréjaille & Benito  
135 Garzón, (2018)). We used a total of 21 climatic variables related with either annual or seasonal  
136 parameters of climate in terms of precipitation and temperature (Table S1). From this database, we  
137 computed the following climate-related variables and indices:

138 i) Long-term climate effect on trees' height population ( $\text{clim}_p$ ) was calculated as the  
139 average climate at the population origin between the beginning of the 20<sup>th</sup> century (1901) and the  
140 year before the trees were planted in the trials. This 'long-term' effect reflects the climate that  
141 occurred when the planted seeds were generated, and it can be related to population effects.

142 ii) Short-term climate effect on trees' height population ( $\text{clim}_t$ ) was calculated as the  
143 average climate at the trial of the last 3 years including the year when measurements were taken.  
144 This definition assures that plastic responses are measured under equal periods of time in all trees

145 for the three species, easing comparisons. This ‘short-term’ effect was defined to reflect the plastic  
146 response of tree height to recent climate.

147           iii) Inter-annual climate variation indices during the 20<sup>th</sup> at the population origin. We  
148 computed the standard deviation (sd) of seven climate variables selected to reflect the past climate  
149 variation encountered by the tree populations since the beginning of 20<sup>th</sup> century (1901) and the  
150 year before the trees were planted. Specifically, we computed the standard deviation (sd) of the  
151 mean annual temperature (sd bio1), sd of the mean diurnal temperature range (sd bio2), sd of the  
152 maximum temperature of the warmest month (sd bio5), sd of the minimum temperature of the  
153 coldest month (sd bio6), sd of the annual precipitation (sd bio12), sd of the precipitation of the  
154 wettest month (sd bio13) and sd of the precipitation of the driest month (sd bio14).

155           All climate-related variables and indices were standardized for further analyses.

156

## 157 **Statistical analyses**

158 We used linear mixed-effect models to account for the following effects: tree age, genetics  
159 (approached by the climate at the population origin,  $clim_p$ ) and plasticity (approached by the climate  
160 at the trial,  $clim_t$ ) on tree height measured across the networks of provenance tests for the three  
161 species. Afterwards, we predict populations’ phenotypic responses across the climatic range  
162 covered by the trials to compute phenotypic plasticity indices to summarize these curves. Our  
163 approach allowed us to obtain linear or non-linear curve responses as these are very common in  
164 nature (Arnold *et al.*, 2019). Then, phenotypic plasticity values can be estimated with more  
165 accurate.

166

### 167 **1. Linear mixed-effect models of tree height responses accounting for age and climate**

168 For each species, we selected one climate variable for the population (hereafter  $clim_p$ ) and another  
169 for the trial (hereafter  $clim_t$ ). This selection was based upon the complementary use of linear mixed-  
170 effects models and on principal components analyses (PCA) of the climate variables (see Appendix  
171 S1 for a detailed description). For *P. nigra*, we selected mean annual temperature (bio1) for  $clim_t$   
172 and annual water availability (WAI) for  $clim_p$ . For *P. pinaster*, annual potential evapotranspiration  
173 (PET) for  $clim_t$  and winter precipitation (prec.djf) for  $clim_p$ . And for *P. pinea*, maximum  
174 temperature of the warmest month (bio5) for  $clim_t$  and summer precipitation (prec.jja) for  $clim_p$  (see  
175 Appendix S2, Table S2 and Figure S2).

176           Linear mixed-effect models were fitted to quantify the effects of tree age,  $clim_p$  and  $clim_t$   
177 on tree height. The model equation takes the form (Eq. 1):

178

179 
$$H = \sum_{i=1}^p \alpha_i X_i + \varepsilon_{ran} + \varepsilon_{res} \quad \text{Eq. 1}$$

180 where  $H$  is tree height,  $\alpha_i$  is the set of  $p$  parameters associated with the main and interactive fixed  
181 effects of  $X_i$  (tree age,  $\text{clim}_p$ ,  $\text{clim}_t$ ),  $\varepsilon_{ran}$  is the variance component associated with the random  
182 terms, and  $\varepsilon_{res}$  is the residual distributed error, usually following a Gaussian distribution (see  
183 Results section).

184 The saturated model for the fixed part,  $\sum_{i=1}^p \alpha_i X_i$ , contained the linear and quadratic  
185 terms for each explanatory variable and all the potential pair-wise and three variable interactions  
186 (i.e.  $\text{Age} \times \text{clim}_p$ ,  $\text{Age} \times \text{clim}_t$ ,  $\text{clim}_p \times \text{clim}_t$ ,  $\text{Age} \times \text{clim}_p \times \text{clim}_t$ ). The random part of  
187 the model allowed us to consider three dimensions of common gardens experiments: a) the  
188 hierarchical nature of the data derived from the experimental design (i.e. populations nested within  
189 blocks, and blocks nested within trials), b) the temporal correlation between repeated measurements  
190 within tree individuals (i.e. individual tree), and c) the potential sources of variation not included in  
191 the fixed effects (such as soil, variation occurring at smaller spatial scales than blocks, etc.). All the  
192 variables were examined for outliers and departures from normality and the linearity of the  
193 relationships of each predictor with the response variable was checked (through residual plots for  
194 each predictor variable in the final model).

195 We selected the best-supported model starting from a saturated model following a  
196 hierarchical backward selection procedure (Burnham & Anderson, 2002; Zuur *et al.*, 2009). For the  
197 random part of the model, we selected the structure with the lowest AIC value (round 1). For the  
198 fixed part, we used the Akaike Information Criterion (AIC) (Akaike, 1992), following the rule that  
199 net increments of lower than two units of AIC associated with the elimination of any parameter in  
200 the full model determined the exclusion of the parameter from the final model. We started by  
201 testing the three-variable interaction (round 2), followed by the two-variable interaction (round 3),  
202 main effects (round 4), and linear effects (round 5).

203 Differences in AIC between models allowed us quantifying the relative importance of  
204 each predictor variable. The random effects were tested using restricted maximum likelihood of the  
205 parameter (REML), and fixed effects using maximum-likelihood (ML). Finally, parameter  
206 estimates of the best-supported model were obtained using restricted maximum likelihood (REML),  
207 which minimizes the likelihood of the residuals from the fixed-effect portions of the model (Zuur *et al.*,  
208 *et al.*, 2009). The variance explained by the model was assessed by pseudo- $R^2$  (Nakagawa &  
209 Schielzeth, 2013) that splits the variance into the marginal  $\text{MR}^2$  (explained solely by the fixed  
210 effects) and conditional  $\text{CR}^2$  (explained by fixed and random effects together). This pseudo- $R^2$   
211 cannot be calculated with all the combinations between the family distributions and link functions  
212 (e.g. Gaussian family with identity link “log”) for linear mixed-effect models, therefore the  
213 goodness of fit of the models was also assessed by computing the capacity of generalization of the

214 model (CG). To do this, we calculated the Pearson coefficient,  $\rho$ , between a model fitted with the  
215 2/3 parts of the data and independently validated with the remaining 1/3 part of the data.  
216 Additionally, to detect collinearity between explanatory variables in the best-supported model we  
217 used the variance inflation factor (VIFs) and set maximum value of VIF to 5 which is considered  
218 acceptable (Belsley, 1991). Appropriateness of the best model was assessed by plots of predicted  
219 vs. observed values. We used the R version 3.2.3 (R Core Team, 2016) run in linux-gnu operating  
220 system to perform all the analyses, and the ‘lme4’ package (Bates *et al.*, 2015).

221

## 222 **2. Computing populations’ phenotypic responses**

223 Using the best-supported model for each species, we predicted populations’ phenotypic responses  
224 curves of tree height across the climatic range covered by the trials,  $clim_t$ , for the three  
225 developmental classes (DC). Specifically, we fixed tree age using the DC, and the climate of origin  
226 of each population ( $clim_p$ ), and then we predict tree height responses curves along the climate of the  
227 trial ( $clim_t$ ) varying between the 99% percentiles observed in  $clim_t$  data.

228

## 229 **3. Computing phenotypic plasticity indices**

230 Using the populations’ phenotypic responses curves of tree height and developmental classes  
231 (DC.1, DC.2 and DC.3), we computed two phenotypic plasticity indices across the climatic ranges  
232 covered by the trials (reviewed in Valladares *et al.*, (2006)).

233 1) Phenotypic plasticity index (PP) computed as follows:

$$234 \text{PP} = (\text{PR}_M - \text{PR}_m) / \text{PR}_M \quad \text{Eq. 2}$$

235 where  $\text{PR}_M$  is the highest phenotypic value across the population’s phenotypic response and across  
236 the climatic range studied.  $\text{PR}_m$  is the lowest phenotypic value across the climatic range studied.  
237 This index ranges between values of zero and one. The closer the values are to zero the less plastic  
238 the population is; and the opposite with values close to one.

239 2) Coefficient of variation of the phenotypic response (CV) computed as follow:

$$240 \text{CV} = \text{sd}(\text{PR}) / \text{mean}(\text{PR}) \quad \text{Eq. 3}$$

241 where PR is the phenotypic value at each point of the climatic range studied across the population’s  
242 phenotypic response fitted. sd is the standard deviation. This index reflects well the range of  
243 phenotype variation across the studied range. This index ranges between zero and one; the smaller  
244 the CV is, the smaller the plasticity is; and the opposite, the greater the CV is, the greater the  
245 plasticity is.

246

## 247 **4. The developmental class effect on populations’ tree height plasticity indices**



248 We tested if plasticity in tree height changed with the developmental class within species. To this  
249 aim, we performed analyses of variance of the two phenotypic plasticity indices, PP and CV, for the  
250 developmental classes and post-hoc pairwise comparisons of Tukey HSD (Honestly Significant  
251 Difference).

252

## 253 **5. The inter-annual climate variation during the 20<sup>th</sup> century effect on tree height plasticity** 254 **indices**

255 For each species and each developmental class, we tested if inter-annual climate variation at the  
256 populations' origin could explain the current degree of phenotypic plasticity measured by the two  
257 phenotypic plasticity indices (PP and CV). To this end, we fitted linear fixed-effect models between  
258 the phenotypic plasticity index (PP or CV, as the response variable) and the set of inter-annual  
259 climate variation indices (sd bio1, sd bio2, sd bio5, sd bio6, sd bio12, sd bio13 and sd bio14, as  
260 explanatory variables) for each developmental class (Eq. 4). Collinearity in the models was  
261 controlled by including climate variation indices whose co-variation measured with the Pearson's  
262 correlation coefficient was below |0.7|.

$$263 \quad PI_j = \sum_{i=1}^p \alpha_i X_i + \varepsilon_{res} \quad \text{Eq. 4}$$

264 where  $PI_j$  is the phenotypic plasticity index at the developmental class  $j$  ( $j= 1, 2$  or  $3$ ),  $\alpha_i$  is the set  
265 of  $p$  parameters associated with the effects of  $X_i$  (sd bio $_i$ ) and  $\varepsilon_{res}$  is the residual error. Models were  
266 fitted with a Gaussian distribution of errors and identity link function. A step-wise procedure  
267 (direction= "backward") was implemented to choose the best-supported model. Appropriateness of  
268 the models were assessed by plots of residuals vs. fitted values, qq-plots and the Cook's distance  
269 that identify outliers in the data that could over-influence the model fitting, if necessary they were  
270 removed from the analysis.

271

## 272 **Results**

### 273 **The model: Tree height responses accounting for tree age and climate**

274 The model that included all the factors tested (tree age,  $\text{clim}_p$  and,  $\text{clim}_t$ ) with the linear and  
275 quadratic effects, and three and two-pairwise interactions, was the best-supported one for the three  
276 species (Table 1). The final model for *P. nigra* included age, mean annual temperature at the trial  
277 ( $\text{bio1}_t$ ) and annual water availability at the populations' origin ( $\text{WAI}_p$ ); *P. pinaster* included age,  
278 annual potential evapotranspiration at the trial ( $\text{PET}_t$ ) and winter precipitation at the populations'  
279 origin ( $\text{prec.djf}_p$ ); and for *P. pinea* included age, maximum temperature of the warmest month at the  
280 trial ( $\text{bio5}_t$ ) and summer precipitation at the populations' origin ( $\text{prec.jja}_p$ ) (Table 2, Table S3 and  
281 Fig. S3). All models produced unbiased estimates of tree height and high capacity of generalization,  
282 as well as high marginal and conditional explained variance,  $\text{CG}/\text{MR}^2/\text{CR}^2$ , with 0.79/not  
283 available/not available, 0.72/0.83/0.96 and 0.80/0.69/0.97) for *P. nigra*, *P. pinaster* and *P. pinea*,  
284 respectively (Table 2).

285

### 286 **Main drivers of tree height triggering populations' phenotypic responses**

287 Overall, tree age made the largest contribution to tree height, followed in order of importance by the  
288 climate at the trial and at the populations' origin:  $\text{clim}_t$  and  $\text{clim}_p$ , respectively (Table 1; see  $\Delta\text{AIC}$   
289 comparisons). The mean annual temperature of the trial presented a positive effect on tree height in  
290 *P. nigra* (Fig.1a and Fig.S4a), but in the other two species, at a certain evaporative demand (either  
291 expressed in mm by annual potential evapotranspiration or degrees Celsius by the maximum  
292 temperature of the warmest month), the temperature had a negative effect on tree height, see  
293 populations' phenotypic responses in Fig.1 and Fig.S4 for *P. nigra* and *P. pinaster*.). The most  
294 important interaction was age with  $\text{clim}_t$ , except in *P. pinaster* that was age with  $\text{clim}_p$  (Tables 1 &  
295 2). Finally, the interaction term between  $\text{clim}_t \times \text{clim}_p$  overall contributed the least to tree height,  
296 although in *P. pinaster* this contribution was higher than in the other species (Table 1 and  
297 populations' phenotypic responses in Fig.1. and Fig.S4.).

298

### 299 **The developmental class effect on populations' tree height plasticity indices**

300 Overall, phenotypic plasticity indices decreased significantly across developmental classes, i.e.  
301 young trees are the most plastic ones (Fig. 2, Tables S4 and S5). The greatest values of plasticity  
302 were found for *P. pinea* and the least for *P. nigra* for all developmental classes (Fig. 2). Finally,  
303 intraspecific phenotypic plasticity variation was the greatest in *P. pinaster* and the lowest in *P.*  
304 *pinea* (Fig. 2).

305

306 **The inter-annual climate variation during the 20<sup>th</sup> century effect on tree height plasticity**  
307 **indices**

308 For the three species, we did not include the standard deviation of annual precipitation (sd bio12) in  
309 the fixed-effect models because it was highly correlated with the standard deviation of the  
310 precipitation of the wettest month (sd bio13): Pearson' correlation coefficients of 0.76, 0.82 and  
311 0.91 for *P. nigra*, *P. pinaster* and *P. pinea*, respectively. Moreover, we removed some populations  
312 whose Cook's distances were above 1 and over-influenced the fitted models (Appendix S3). Also,  
313 the model fitted for early adults in *P. pinea* using the CV index was not included in the results as it  
314 did not accomplished the linearity assumptions.

315 Overall, inter-annual temperature and precipitation variation during the 20<sup>th</sup> century in  
316 the standard deviation (sd) of the maximum temperature of the warmest month (sd bio5), sd of the  
317 precipitation of the wettest month (sd bio13) and sd of the precipitation of the driest month (sd  
318 bio14) were positively correlated with phenotypic plasticity indices (Table 3); while inter-annual  
319 variation in sd of the average annual temperature (sd bio1) was negatively correlated with  
320 phenotypic plasticity indices, with the exception of the developmental class 3 in *P. nigra* and *P.*  
321 *pinea* (Table 3). The variance explained by the phenotypic plasticity indices models (P.I.) was high,  
322 and ranged between 0.69 and 0.70 for *P. nigra*, 0.80 and 0.84 for *P. pinaster*, and 0.71 and 0.76 for  
323 *P. pinea* (Table 3).

324 The results of the two indices were similar (Table 3). For illustrative purposes we plot the  
325 PP and CV indices along the sd bio5 variable that was statistically significant in all the models  
326 tested. Overall, we found that populations that experienced higher inter-annual climate variation  
327 during the 20<sup>th</sup> century (sd bio5) presented higher plasticity in tree height for the three  
328 developmental classes, except in the developmental class 3 for *P. nigra* and *P. pinea* (Fig.3 and  
329 Fig.S5). Spatial differences among populations of PP and CV were also similar, with more  
330 contrasted differences among populations for *P. pinaster* (Fig. 1 and Fig. S5).

## 331 **Discussion**

332 The use of range-wide multi-year tree height measurements compiled on common gardens allowed  
333 us to quantify the effect of tree age, population differentiation and plasticity across the distribution  
334 ranges of three Mediterranean pines. Overall, our results show that: (i) A significant part of  
335 phenotypic plasticity in tree height was explained by the inter-annual climate variation during the  
336 20<sup>th</sup> century under which tree populations evolved; (ii) Younger trees were more plastic in tree  
337 height than older trees; (iii) Although populations' responses to climate were largely driven by  
338 phenotypic plasticity we did not find a geographical pattern of phenotypic plasticity across the  
339 species' ranges.

340

### 341 **Main climatic drivers of tree height triggering populations' phenotypic responses**

342 Plastic responses in tree height were mainly driven by temperature-related variables (annual mean  
343 temperature, annual potential evapotranspiration and maximum temperature of the warmest month),  
344 and in general, rising temperatures led to higher trees up to a certain value. This result is in  
345 agreement with previous studies suggesting that higher heights in pines are found at warmer sites, if  
346 drought is not limiting (Vizcaíno-Palomar *et al.*, 2016). This could be explained because warm  
347 temperatures, up to a certain threshold, allow trees to have higher photosynthetic capacity, resulting  
348 in a higher rate of carbon assimilation (Way & Oren, 2010) but going beyond that threshold, it can  
349 imply the opposite effect. Accordingly, in *P. pinaster* and *P. pinea* tree height decreases when the  
350 evaporative demand is too high due to stomatal closure and reduction of the photosynthetic activity  
351 (Pasho *et al.*, 2012; Mazza *et al.*, 2014). However, we did not find that threshold in *P. nigra*. This  
352 species is found at higher altitudes than *P. pinaster* and *P. pinea*, in mountainous areas where high  
353 temperatures can be counterbalanced by the altitude effect and hence allow for increments of tree  
354 height growth. Moreover, it can be explained by the fact that the range of climate covered by the  
355 trials do not cover the complete population's phenotypic response, explaining the lack of a  
356 maximum tree height as it have been found in the other two species. Altogether, these results  
357 suggest that high temperatures linked with water stress are the main climatic drivers limiting tree  
358 height in the three pine species studied.

359 The main driver of population differentiation (population effect) in tree height was  
360 precipitation (for *P. pinaster* and *P. pinea*) and annual water availability (for *P. nigra*). This points  
361 out to the selective role of water availability across the distribution range of these mostly  
362 Mediterranean trees (Pigott & Pigott, 1993). Our findings suggest that evolutionary processes in  
363 tree height were mostly driven by water availability (Aranda *et al.*, 2009; Sánchez-Gómez *et al.*,  
364 2011), although local adaptation is driven by minimum winter temperatures for *P. nigra* (Kreyling  
365 *et al.*, 2012), and by mean annual temperature for *Pinus pinea* (Mutke *et al.*, 2010). The highest

366 differences in tree height among populations were found for *P. nigra* and *P. pinaster* (Fig. 1a. and  
367 Fig. 1e.). In general, populations originating from the extremes of the climatic gradient, either under  
368 high or low values in rainfall or water availability, underperformed compared to populations  
369 originating from intermediate climates, but these differences are more marked in *P. pinaster*. For  
370 example, *P. pinaster* populations from the south of the distribution are better adapted to drought:  
371 they invest higher biomass to root and less to stem development than populations from northern  
372 parts of the distribution (Aranda *et al.*, 2009). In *P. nigra*, differences in tree height due to genetic  
373 effects have also been recorded (Thiel *et al.*, 2012), whereas *P. pinea* shows low genetic variation  
374 among populations (Fig.1i.). This is in agreement with previous studies reporting little genetic  
375 variation in morphological and physiological quantitative traits -e.g. photosynthesis, biomass  
376 partitioning, SLA, etc. (Court-Picon *et al.*, 2004; Mutke *et al.*, 2010; Sánchez-Gómez *et al.*, 2011)  
377 but null in Chambel *et al.*, (2007).

378

### 379 **The developmental class effect on populations' tree height plasticity indices**

380 Young pine trees were more plastic than early adults (Fig. 2). This result suggests that the capacity  
381 to respond plastically changes along the life cycle of trees. Phenotypic plasticity differ among  
382 species, among populations, among traits (Valladares *et al.*, 2002; Bradshaw, 2006), and here we  
383 show that it also varies with age. The first stages of recruitment are critical for plant establishment,  
384 and hence greater capacity of plasticity in tree height can be advantageous to avoid competition and  
385 reach light. In addition, small changes in the environment can be more noticeable for seedlings than  
386 to saplings or adult trees that are already well established with their root systems installed into  
387 deeper layers of the soil compared to seedlings. For instance, soil moisture variation is higher in the  
388 shallow layers of the soil than in deeper ones, hence promoting greater phenotypic plasticity. As a  
389 consequence, phenotypic plasticity variation across developmental classes can impact into many  
390 ecological processes, such as population and community dynamics, the community assembly and  
391 ecosystem functioning.

392

### 393 **The inter-annual climate variation during the 20<sup>th</sup> century effect on tree height plasticity** 394 **indices**

395 Our findings suggest that plasticity in tree height is a trait that is under selection driven by climate  
396 variability (Table 3, Fig. 3 and Fig. S5). This finding is consistent for the three Mediterranean  
397 species regardless the origin of the populations. Populations that evolved under high inter-annual  
398 climate variation, in either maximum or minimum values in temperature or precipitation of climate  
399 variables associated with extreme values (standard deviation of the maximum temperature of the  
400 warmest month, sd of the precipitation of the wettest month and sd of the precipitation of the driest

401 month) during the 20<sup>th</sup> century, have great capacity to respond plastically in tree height to changes  
402 in climate (Fig. 3), regardless their position at the core or at the margin of the distribution range  
403 (maps in Fig. 1 and Fig.S4). These results are in agreement with previous studies in plant species  
404 where plastic responses were associated with climate variation in *Convolvulus chilensis* and *Senna*  
405 *candolleana* (Gianoli & González-Teuber, 2005; Lázaro-Nogal *et al.*, 2015). Although local  
406 adaptation (population effect in common garden data) seems to clearly follow a geographical  
407 pattern in European trees (including the ones studied here) (Frejaville *et al.*), our results show that  
408 plasticity geographical patterns are more complex (Valladares *et al.*, 2014).

409

#### 410 **Implications of phenotypic plasticity for evolutionary responses to climate change**

411 Our findings are important in the context of climate change because plastic genotypes would likely  
412 increase their odds to persist at the short-time if plasticity is adaptive, and can also be advantageous  
413 if plastic genotypes are subject to further evolution that promotes the necessary genetic changes to  
414 reach the new optimum and get adapted to the new environment (Pigliucci, 2005; Richards *et al.*,  
415 2006). Among the three studied species, *P. pinaster* presents high values of plasticity in tree height  
416 combined with a high differentiation among populations (Fig. 1e. and Fig. 2), suggesting good  
417 chances to respond to climate change in the short term by phenotypic plasticity and keeping  
418 evolutionary potential to adapt in the long term. *P. pinea* presents the highest phenotypic plasticity  
419 values out of the three studied species, but combined with low differentiation among populations  
420 and low genetic diversity (Fig. 1i. and Fig. 2), which makes plasticity virtually the unique way for  
421 this species to respond to changes in the environment. However, we cannot rule out that plasticity  
422 for tree height is related to higher fitness and our results call into question whether higher plasticity  
423 could be adaptive and hence beneficial to cope with climate change in the short-term.

424

#### 425 **Limitations**

426 Although the network of provenance tests used in the present study cover relatively well the species  
427 distribution ranges, our results of phenotypic plasticity in tree height are confined to the climatic  
428 gradients covered by these common gardens. For example, in *P. nigra* phenotypic plasticity values  
429 could have been underestimated because the maximum tree height is not reached within the mean  
430 annual temperature range studied. Improved results regarding phenotypic plasticity could be  
431 obtained by establishing new common gardens both within the species' distribution to complete the  
432 range and outside the climatic range of the species.

433

#### 434 **Conclusions**

435 Under a climate change context, the potential of the three species to persist *in-situ* largely rely on  
436 their plastic responses, regardless of their genetic diversity. The predominance of the plastic effect  
437 over the genetic one highlights that at the short-term, species' strategy to keep pace with climate  
438 change will likely rely on eco-physiological adjustments to environmental changes rather than on  
439 evolutionary responses. However, our current understanding of plasticity makes difficult to  
440 ascertain if plasticity will be adaptive and in case, which will be the real limits of plasticity.  
441 Therefore, to allow species persistence in the long-term, genetic variation within populations is  
442 essential to respond by evolutionary processes to environmental changes. Likewise, our results call  
443 into question whether future climate change variation would promote plasticity in the near future as  
444 our results showed that happened in the 20<sup>th</sup> century.  
445

446 **References**

- 447 Akaike, H. (1992) *Information theory and an extension of the maximum likelihood principle*.  
448 *Breakthroughs in statistics* (ed. by S Kotz and N Johnson), pp. 610–624. Springer-Verlag,  
449 London, UK.
- 450 Aranda, I., Alía, R., Ortega, U., Dantas, Â.K. & Majada, J. (2009) Intra-specific variability in  
451 biomass partitioning and carbon isotopic discrimination under moderate drought stress in  
452 seedlings from four *Pinus pinaster* populations. *Tree Genetics and Genomes*, **6**, 169–178.
- 453 Arnold, P.A., Kruuk, L.E.B. & Nicotra, A.B. (2019) How to analyse plant phenotypic plasticity in  
454 response to a changing climate. *New Phytologist*, **222**, 1235–1241.
- 455 Bates, D., Maechler, M., Bolker, B. & Walker, S. (2015) Fitting Linear Mixed-Effects Models  
456 Using lme4. *Journal of Statistical Software*, **67**, 1–48.
- 457 Baythavong, B.S. (2011) Linking the Spatial Scale of Environmental Variation and the Evolution of  
458 Phenotypic Plasticity: Selection Favors Adaptive Plasticity in Fine-Grained Environments. *The*  
459 *American Naturalist*, **178**, 75–87.
- 460 Belsley, D.A. (1991) A Guide to using the collinearity diagnostics. *Computer Science in Economics*  
461 *and Management*, **4**, 33–50.
- 462 Benito Garzón, M., Robson, T.M. & Hampe, A. (2019)  $\Delta$ Trait SDMs: species distribution models  
463 that account for local adaptation and phenotypic plasticity. *New Phytologist*, **222**, 1757–1765.
- 464 Bradshaw, A.D. (2006) Unravelling phenotypic plasticity? why should we bother? *New Phytologist*,  
465 **170**, 644–648.
- 466 Bradshaw, W. & Holzapfel, C. (2001) Genetic shift in photoperiodic response correlated with  
467 global warming. *Proceedings of the National Academy of Sciences*, **98**, 14509–14511.
- 468 Burnham, K.P. & Anderson, D.R. (2002) *Model selection and multimodel inference: A practical*  
469 *Information-Theoretic approach*, (ed. by 2nd edn.) Springer-Verlag, New York.
- 470 Canale, C. & Henry, P. (2010) Adaptive phenotypic plasticity and resilience of vertebrates to  
471 increasing climatic unpredictability. *Climate Research*, **43**, 135–147.
- 472 Chambel, M.R., Climent, J. & Alía, R. (2007) Divergence among species and populations of  
473 Mediterranean pines in biomass allocation of seedlings grown under two watering regimes.  
474 *Annals of Forest Science*, **64**, 87–97.
- 475 Chen, I.C., Hill, J.K., Ohlemüller, R., Roy, D.B. & Thomas, C.D. (2011) Rapid range shifts of  
476 species associated with high levels of climate warming. *Science (New York, N.Y.)*, **333**, 1024–  
477 6.
- 478 Coleman, J.S., McConnaughay, K.D. & Ackerly, D.D. (1994) Interpreting phenotypic variation in  
479 plants. *Trends in ecology & evolution*, **9**, 187–91.
- 480 Court-Picon, M., Gadbin-Henry, C., Guibal, F. & Roux, M. (2004) Dendrometry and morphometry



- 481 of *Pinus pinea* L. in Lower Provence (France): adaptability and variability of provenances.  
482 *Forest Ecology and Management*, **194**, 319–333.
- 483 Donelson, J.M., Salinas, S., Munday, P.L. & Shama, L.N.S. (2018) Transgenerational plasticity and  
484 climate change experiments: Where do we go from here? *Global Change Biology*, **24**, 13–34.
- 485 Evans, C.G. (1972) *The Qualitative Analysis of Plant Growth*, Blackwell Scientific Publications,  
486 Oxford, UK.
- 487 Fady, B. (2012) Biogeography of neutral genes and recent evolutionary history of pines in the  
488 Mediterranean Basin. *Annals of Forest Science*, **69**, 421–428.
- 489 Franks, S.J., Sim, S. & Weis, A.E. (2007) Rapid evolution of flowering time by an annual plant in  
490 response to a climate fluctuation. *Proceedings of the National Academy of Sciences*, **104**,  
491 1278–1282.
- 492 Fréjaville, T. & Benito Garzón, M. (2018) The EuMedClim Database: Yearly Climate Data (1901–  
493 2014) of 1 km Resolution Grids for Europe and the Mediterranean Basin. *Frontiers in Ecology  
494 and Evolution*, **6**, 31.
- 495 Frejaville, T., Vizcaíno-Palomar, N., Fady, B., Kremer, A. & Benito Garzón, M. Climate adaptation  
496 lags are higher in populations at the range margins than at the distribution core of European  
497 trees. *under review*.
- 498 Gavrillets, S. & Scheiner, S.M. (1993) The genetics of phenotypic plasticity. V. Evolution of  
499 reaction norm shape. *Journal of Evolutionary Biology*, **6**, 31–48.
- 500 Gianoli, E. & González-Teuber, M. (2005) Environmental Heterogeneity and Population  
501 Differentiation in Plasticity to Drought in *Convolvulus Chilensis* (Convolvulaceae).  
502 *Evolutionary Ecology*, **19**, 603–613.
- 503 King, D.A. (1990) The adaptive significance of tree height. *The American Naturalist*, **135**, 809–  
504 828.
- 505 Kreyling, J., Wiesenberg, G.L.B., Thiel, D., Wohlfart, C., Huber, G., Walter, J., Jentsch, A.,  
506 Konnert, M. & Beierkuhnlein, C. (2012) Cold hardiness of *Pinus nigra* Arnold as influenced  
507 by geographic origin, warming, and extreme summer drought. *Environmental and  
508 Experimental Botany*, **78**, 99–108.
- 509 Lázaro-Nogal, A., Matesanz, S., Godoy, A., Pérez-Trautman, F., Gianoli, E. & Valladares, F.  
510 (2015) Environmental heterogeneity leads to higher plasticity in dry-edge populations of a  
511 semi-arid Chilean shrub: insights into climate change responses. *Journal of Ecology*, **103**, 338–  
512 350.
- 513 Lenoir, J., Gegout, J.C., Marquet, P.A., de Ruffray, P. & Brisse, H. (2008) A Significant Upward  
514 Shift in Plant Species Optimum Elevation During the 20th Century. *Science*, **320**, 1768–1771.
- 515 Lind, M.I. & Johansson, F. (2007) The degree of adaptive phenotypic plasticity is correlated with

- 516 the spatial environmental heterogeneity experienced by island populations of *Rana temporaria*.  
517 *Journal of Evolutionary Biology*, **20**, 1288–1297.
- 518 Mazza, G., Cutini, A., Manetti, M.C. & Chiara Manetti, M. (2014) Site-specific growth responses to  
519 climate drivers of *Pinus pinea* L. tree rings in Italian coastal stands. *Annals of Forest Science*,  
520 **71**.
- 521 Médail, F. & Diadema, K. (2009) Glacial refugia influence plant diversity patterns in the  
522 Mediterranean Basin. *Journal of Biogeography*, **36**, 1333–1345.
- 523 Mediavilla, S. & Escudero, A. (2004) Stomatal responses to drought of mature trees and seedlings  
524 of two co-occurring Mediterranean oaks. *Forest Ecology and Management*, **187**, 281–294.
- 525 Mitchell, R.M. & Bakker, J.D. (2014) Intraspecific Trait Variation Driven by Plasticity and  
526 Ontogeny in *Hypochaeris radicata*. *PLoS ONE*, **9**, e109870.
- 527 Molina-Montenegro, M.A. & Naya, D.E. (2012) Latitudinal Patterns in Phenotypic Plasticity and  
528 Fitness-Related Traits: Assessing the Climatic Variability Hypothesis (CVH) with an Invasive  
529 Plant Species. *PLoS ONE*, **7**.
- 530 Mutke, S., Gordo, J., Chambel, M.R., Prada, M.A., Álvarez, D., Iglesias, S. & Gil, L. (2010)  
531 Phenotypic plasticity is stronger than adaptive differentiation among Mediterranean stone  
532 pine provenances. *Forest Systems*, **19**, 354.
- 533 Mutke, S., Gordo, J., Khouja, M. & Fady, B. (2013) Low genetic and high environmental diversity  
534 at adaptive traits in *Pinus pinea* from provenance tests in France and Spain. *Options*  
535 *Méditerranéennes A*, **105**, 73–79.
- 536 Nakagawa, S. & Schielzeth, H. (2013) A general and simple method for obtaining  $R^2$  from  
537 generalized linear mixed-effects models. *Methods in Ecology and Evolution*, **4**, 133–142.
- 538 Pasho, E., Camarero, J.J., Luis, M. & Vicente-Serrano, S.M. (2012) Factors driving growth  
539 responses to drought in Mediterranean forests. *European Journal of Forest Research*, **131**,  
540 1797–1807.
- 541 Pigliucci, M. (2005) Evolution of phenotypic plasticity: where are we going now? *Trends in*  
542 *Ecology & Evolution*, **20**, 481–486.
- 543 Pigott, C.D. & Pigott, S. (1993) Water as a determinant of the distribution of trees at the boundary  
544 of the Mediterranean zone. *Journal of Ecology*, **81**, 557–566.
- 545 Poloczanska, E.S., Brown, C.J., Sydeman, W.J., Kiessling, W., Schoeman, D.S., Moore, P.J.,  
546 Brander, K., Bruno, J.F., Buckley, L.B., Burrows, M.T., Duarte, C.M., Halpern, B.S., Holding,  
547 J., Kappel, C. V., O'Connor, M.I., Pandolfi, J.M., Parmesan, C., Schwing, F., Thompson, S.A.  
548 & Richardson, A.J. (2013) Global imprint of climate change on marine life. *Nature Climate*  
549 *Change*, **3**, 919–925.
- 550 Pulido, F. & Berthold, P. (2004) Microevolutionary Response to Climatic Change. *Advances in*

- 551 *Ecological Research*, **35**, 151–183.
- 552 R Core Team (2016) A language and environment for statistical computing.
- 553 Reale, D., McAdam, A.G., Boutin, S. & Berteaux, D. (2003) Genetic and plastic responses of a  
554 northern mammal to climate change. *Proceedings of the Royal Society B: Biological Sciences*,  
555 **270**, 591–596.
- 556 Rehfeldt, G.E., Tchebakova, N.M., Parfenova, Y.I., Wykoff, W.R., Kuzmina, N.A. & Milyutin, L.I.  
557 (2002) Intraspecific responses to climate in *Pinus sylvestris*. *Global Change Biology*, **8**, 912–  
558 929.
- 559 Richards, C.L., Bossdorf, O., Muth, N.Z., Gurevitch, J. & Pigliucci, M. (2006) Jack of all trades,  
560 master of some? On the role of phenotypic plasticity in plant invasions. *Ecology Letters*, **9**,  
561 981–993.
- 562 Sánchez-Gómez, D., Valladares, F. & Zavala, M.A. (2006) Performance of seedlings of  
563 Mediterranean woody species under experimental gradients of irradiance and water  
564 availability: trade-offs and evidence for niche differentiation. *The New phytologist*, **170**, 795–  
565 806.
- 566 Sánchez-Gómez, D., Velasco-Conde, T., Cano-Martín, F.J., Ángeles Guevara, M., Teresa Cervera,  
567 M. & Aranda, I. (2011) Inter-clonal variation in functional traits in response to drought for a  
568 genetically homogeneous Mediterranean conifer. *Environmental and Experimental Botany*, **70**,  
569 104–109.
- 570 Savolainen, O., Pyhäjärvi, T. & Knürr, T. (2007) Gene flow and local adaptation in trees. *Annual*  
571 *Review of Ecology, Evolution, and Systematics*, **38**, 595–619.
- 572 Schlichting, C.D. & Pigliucci, M. (1998) *Phenotypic Evolution. A Reaction Norm Perspective*,  
573 Sinauer Associates Inc, Sunderland, Massachusetts.
- 574 Soto, A., Robledo-Arnuncio, J.J., González-Martínez, S.C., Smouse, P.E. & Alía, R. (2010)  
575 Climatic niche and neutral genetic diversity of the six Iberian pine species: a retrospective and  
576 prospective view. *Molecular ecology*, **19**, 1396–409.
- 577 Sultan, S.E. (2000) Phenotypic plasticity for plant development, function and life history. *Trends in*  
578 *Plant Science*, **5**, 537–542.
- 579 Sunday, J.M., Bates, A. & Dulvy, N. (2011) Global analysis of thermal tolerance and latitude in  
580 ectotherms. *Proceedings of the Royal Society B: Biological Sciences*, **278**, 1823–1830.
- 581 Taïbi, K., del Campo, A.D., Aguado, A. & Mulet, J.M. (2016) Early establishment response of  
582 different *Pinus nigra* ssp. *salzmanii* seed sources on contrasting environments: Implications for  
583 future reforestation programs and assisted population migration. *Journal of Environmental*  
584 *Management*, **171**, 184–194.
- 585 Thiel, D., Nagy, L., Beierkuhnlein, C., Huber, G., Jentsch, A., Konnert, M. & Kreyling, J. (2012)

- 586 Uniform drought and warming responses in *Pinus nigra* provenances despite specific overall  
587 performances. *Forest Ecology and Management*, **270**, 200–208.
- 588 Valladares, F., Balaguer, L., Martínez-Ferri, E., Perez-Corona, E. & Manrique, E. (2002) Plasticity,  
589 instability and canalization: Is the phenotypic variation in seedlings of sclerophyll oaks  
590 consistent with the environmental unpredictability of Mediterranean ecosystems? *New*  
591 *Phytologist*, **156**, 457–467.
- 592 Valladares, F., Matesanz, S., Guilhaumon, F., Araújo, M.B., Balaguer, L., Benito Garzón, M.,  
593 Cornwell, W., Gianoli, E., van Kleunen, M., Naya, D.E., Nicotra, A.B., Poorter, H. & Zavala,  
594 M.A. (2014) The effects of phenotypic plasticity and local adaptation on forecasts of species  
595 range shifts under climate change. *Ecology Letters*, **17**, 1351–1364.
- 596 Valladares, F., Sánchez-Gómez, D. & Zavala, M.A. (2006) Quantitative estimation of phenotypic  
597 plasticity: Bridging the gap between the evolutionary concept and its ecological applications.  
598 *Journal of Ecology*, **94**, 1103–1116.
- 599 Varelides, C., Brofas, G. & Varelides, Y. (2001) Provenance variation in *Pinus nigra* at three sites  
600 in Northern Greece. **58**, 893–900.
- 601 Vendramin, G.G., Fady, B., González-Martínez, S.C., Hu, F.S., Scotti, I., Sebastiani, F., Soto, Á. &  
602 Petit, R.J. (2008) Genetically depauperate but widespread: the case of an emblematic  
603 mediterranean pine. *Evolution*, **62**, 680–688.
- 604 Vizcaíno-Palomar, N., Benito Garzón, M., Alía, R., Giovannelli, G., Huber, G., Mutke, S.,  
605 Pastuszka, P., Raffin, A., Sbay, H., Seho, M., Vauthier, D. & Fady, B. (2019) Geographic  
606 variation of tree height of three pine species (*Pinus nigra* Arn., *P. pinaster* Aiton and *P. pinea*  
607 L.) gathered from common gardens in Europe and North-Africa. *Annals of Forest Science*,  
608 **accepted**.
- 609 Vizcaíno-Palomar, N., Ibáñez, I., González-Martínez, S.C., Zavala, M.A. & Alía, R. (2016)  
610 Adaptation and plasticity in aboveground allometry variation of four pine species along  
611 environmental gradients. *Ecology and Evolution*, **6**, 7561–7573.
- 612 Way, D.A. & Oren, R. (2010) Differential responses to changes in growth temperature between  
613 trees from different functional groups and biomes: a review and synthesis of data. *Tree*  
614 *Physiology*, **30**, 669–688.
- 615 West-Eberhard, M.J. (2003) *Developmental Plasticity and Evolution*, Oxford University Press,  
616 incl., New York.
- 617 Zuur, A.F., Ieno, E.N., Walker, N., Saveliev, A.A. & Smith, G.M. (2009) *Mixed Effects Models and*  
618 *Extensions in Ecology with R*, Springer.

619 **Data Accessibility Statement**

620 All phenotypic data used in this study are available on ZENODO with DOIs

621 10.5281/zenodo.3250704, 10.5281/zenodo.3250698 and 10.5281/zenodo.3250707 for *P. nigra*, *P.*

622 *pinaster* and *P. pinea*, respectively (Vizcaíno-Palomar *et al.*, 2019).

623 **Table 1** Random and fixed effects selection of tree height model in response to age,  $clim_t$  and  $clim_p$  using the Akaike Information Criterion (AIC) for  
 624 the three pine species.

| <u><i>Pinus nigra</i></u>                   | df | AIC     | $\Delta$ AIC | <u><i>Pinus pinaster</i></u>                 | df | AIC    | $\Delta$ AIC |
|---------------------------------------------|----|---------|--------------|----------------------------------------------|----|--------|--------------|
| <i>Random effects selection</i>             |    |         |              |                                              |    |        |              |
| # round 1: testing random structure         |    |         |              |                                              |    |        |              |
| full model just fixed effects (fixed)       | 12 | 2239318 |              | fixed                                        | 12 | 175302 |              |
| fixed + block effect                        | 15 | 2002183 |              | fixed + block effect                         | 15 | 80711  |              |
| fixed + tree ind                            | 13 | 1917911 |              | fixed + tree ind                             | 13 | 143270 |              |
| fixed + block effect + tree ind             | 16 | 1888388 |              | fixed + block effect + tree ind              | 16 | 77968  |              |
| <i>Fixed effects selection</i>              |    |         |              |                                              |    |        |              |
| # round 2: three way interactions           |    |         |              |                                              |    |        |              |
| full model                                  | 16 | 1888388 | 0            | full model                                   | 16 | 77862  | 0            |
| no age $\times$ bio1 $_t$ $\times$ WAI $_p$ | 15 | 1888727 | 339          | age $\times$ PET $_t$ $\times$ prec.djf $_p$ | 15 | 77885  | 23           |
| # round 3: two way interactions             |    |         |              |                                              |    |        |              |
| full model                                  | 16 | 1888388 | 0            | full model                                   | 16 | 77862  | 0            |
| no age $\times$ bio1 $_t$                   | 15 | 1897136 | 8748         | no age $\times$ PET $_t$                     | 15 | 78141  | 279          |
| no age $\times$ WAI $_p$                    | 15 | 1888506 | 117          | no age $\times$ prec.djf $_p$                | 15 | 78772  | 910          |
| no bio1 $_t$ $\times$ WAI $_p$              | 15 | 1888401 | 13           | no PET $_t$ $\times$ prec.djf $_p$           | 15 | 77959  | 97           |
| # round 4: main effects                     |    |         |              |                                              |    |        |              |
| full model                                  | 16 | 1888388 | 0            | full model                                   | 16 | 77862  | 0            |
| no age                                      | 11 | 2605168 | 716780       | no age                                       | 11 | 367581 | 289719       |
| no bio1 $_t$                                | 11 | 1916110 | 27722        | no PET $_t$                                  | 11 | 123183 | 45321        |
| no WAI $_p$                                 | 11 | 1888975 | 587          | no prec.djf $_p$                             | 11 | 79360  | 1498         |
| # round 5: linear effects                   |    |         |              |                                              |    |        |              |
| full model                                  | 16 | 1888388 | 0            | full model                                   | 16 | 77862  | 0            |
| no quadratic effect age                     | 15 | 2083109 | 194721       | no quadratic effect age                      | 15 | 181836 | 103974       |
| no quadratic effect bio1 $_t$               | 15 | 1889004 | 616          | no quadratic effect PET $_t$                 | 15 | 85070  | 7208         |
| no quadratic effect WAI $_p$                | 15 | 1888398 | 10           | no quadratic effect prec.djf $_p$            | 14 | 80797  | 2935         |

625

| <i>Pinus pinea</i>                           | df | AIC    | $\Delta$ AIC |
|----------------------------------------------|----|--------|--------------|
| <i>Random effects selection</i>              |    |        |              |
| # round 1: assessing random structure        |    |        |              |
| fixed                                        | 12 | 53113  |              |
| rand_bl                                      | 15 | 19110  |              |
| rand_ind                                     | 13 | 37939  |              |
| rand_both                                    | 16 | 16898  |              |
| <i>Fixed effects selection</i>               |    |        |              |
| # round 2: three way interactions            |    |        |              |
| full model                                   | 16 | 16790  | 0            |
| age bio5 <sub>t</sub> ×prec.jja <sub>p</sub> | 15 | 16797  | 7            |
| # round 3: two way interactions              |    |        |              |
| full model                                   | 16 | 16790  | 0            |
| no age×bio5 <sub>t</sub>                     | 15 | 23396  | 6606         |
| no age×prec.jja <sub>p</sub>                 | 15 | 16807  | 17           |
| no bio5 <sub>t</sub> ×prec.jja <sub>p</sub>  | 15 | 16794  | 4            |
| # round 4: main effects                      |    |        |              |
| full model                                   | 16 | 16790  | 0            |
| no age                                       | 11 | 154070 | 137280       |
| no bio5 <sub>t</sub>                         | 11 | 29128  | 12337        |
| no prec.jja <sub>p</sub>                     | 11 | 16829  | 39           |
| # round 5: linear effects                    |    |        |              |
| full model                                   | 16 | 16790  | 0            |
| no quadratic effect age                      | 15 | 41981  | 25190        |
| no quadratic effect PET <sub>t</sub>         | 15 | 28835  | 12044        |
| no quadratic effect prec.djf <sub>p</sub>    | 14 | 19025  | 2234         |

626 df are the degrees of freedom, AIC is the Akaike Information Criterion value,  $\Delta$ AIC is the difference between the full model and the models tested in  
627 each round. In random effects selection, the smaller the AIC is, the better supported the random structure part is. In fixed effects selection, if  $\Delta$ AIC  
628 comparing two models is smaller than 2 units then we remove that effect from the full model.

629 **Table 2** Detailed description of the best-supported model for each pine species analyzed including the family distribution and link function, the  
 630 variance and standard deviation for the random effects (Var and SD respectively); and the estimated parameter, standard error and t-values for  
 631 the fixed-effects (Estimate, SE and t-values, respectively).

***Pinus nigra***

| Family distribution and link function:     | Gaussian distribution error and identity link "log" |         |         |
|--------------------------------------------|-----------------------------------------------------|---------|---------|
| <i>Random effects</i>                      |                                                     | Var     | SD      |
| Id_tree                                    | (Intercept)                                         | 20.613  | 4.54    |
| Provenance/Block/Trial                     | (Intercept)                                         | 9.567   | 3.09    |
| Block/Trial                                | (Intercept)                                         | 2.222   | 1.49    |
| Trial                                      | (Intercept)                                         | 63.428  | 7.96    |
| Residual                                   |                                                     | 282.506 | 16.81   |
| <i>Fixed effects</i>                       | Estimate                                            | SE      | t value |
| (Intercept)                                | 4.710                                               | 0.120   | 39.35   |
| age                                        | 1.166                                               | 0.001   | 1250.89 |
| bio1 <sub>t</sub>                          | 0.318                                               | 0.002   | 128.67  |
| bio1 <sub>t</sub> <sup>2</sup>             | -0.035                                              | 0.001   | -24.88  |
| age <sup>2</sup>                           | -0.212                                              | 0.000   | -527.92 |
| WAI <sub>p</sub>                           | 0.021                                               | 0.006   | 3.59    |
| WAI <sub>p</sub> <sup>2</sup>              | -0.015                                              | 0.004   | -3.45   |
| age × bio1 <sub>t</sub>                    | -0.048                                              | 0.001   | -93.39  |
| age × WAI <sub>p</sub>                     | 0.002                                               | 0.001   | 3.73    |
| bio1 <sub>t</sub> × WAI <sub>p</sub>       | 0.008                                               | 0.002   | 3.84    |
| age × bio1 <sub>t</sub> × WAI <sub>p</sub> | -0.010                                              | 0.001   | -18.43  |
| CG                                         | 0.79                                                |         |         |
| MR <sup>2</sup>                            | -                                                   |         |         |
| CR <sup>2</sup>                            | -                                                   |         |         |

***Pinus pinaster***

| Family distribution and link function:         | Gaussian distribution error and log (H) |       |          |
|------------------------------------------------|-----------------------------------------|-------|----------|
| <i>Random effects</i>                          |                                         | Var   | SD       |
| Id_tree                                        | (Intercept)                             | 0.01  | 0.11     |
| Provenance/Block/Trial                         | (Intercept)                             | 0.041 | 0.20     |
| Block/Trial                                    | (Intercept)                             | 0.004 | 0.07     |
| Trial                                          | (Intercept)                             | 0.271 | 0.52     |
| Residual                                       |                                         | 0.093 | 0.31     |
| <i>Fixed effects</i>                           | Estimate                                | SE    | t value  |
| (Intercept)                                    | 6.150                                   | 0.140 | 44.022   |
| age                                            | 1.422                                   | 0.002 | 923.084  |
| PET <sub>t</sub>                               | -0.812                                  | 0.006 | -127.091 |
| PET <sub>t</sub> <sup>2</sup>                  | -0.379                                  | 0.004 | -86.587  |
| prec.djf <sub>p</sub>                          | 0.043                                   | 0.005 | 8.278    |
| prec.djf <sub>p</sub> <sup>2</sup>             | -0.044                                  | 0.003 | -14.141  |
| age <sup>2</sup>                               | -0.366                                  | 0.001 | -418.081 |
| age × PET <sub>t</sub>                         | 0.028                                   | 0.002 | 16.764   |
| age × prec.djf <sub>p</sub>                    | -0.040                                  | 0.001 | -30.268  |
| PET <sub>t</sub> × prec.djf <sub>p</sub>       | -0.034                                  | 0.003 | -9.983   |
| age × PET <sub>t</sub> × prec.djf <sub>p</sub> | 0.008                                   | 0.002 | 5.030    |
| CG                                             | 0.72                                    |       |          |
| MR <sup>2</sup>                                | 0.83                                    |       |          |
| CR <sup>2</sup>                                | 0.96                                    |       |          |



***Pinus pinea***

| Family distribution and link function:          | Gaussian distribution error and log (H) |       |          |
|-------------------------------------------------|-----------------------------------------|-------|----------|
| <i>Random effects</i>                           |                                         | Var   | SD       |
| Id_tree                                         | (Intercept)                             | 0.014 | 0.12     |
| Provenance/Block/Trial                          | (Intercept)                             | 0.007 | 0.09     |
| Block/Trial                                     | (Intercept)                             | 0.017 | 0.13     |
| Trial                                           | (Intercept)                             | 0.601 | 0.78     |
| Residual                                        |                                         | 0.062 | 0.25     |
| <i>Fixed effects</i>                            | Estimate                                | SE    | t value  |
| (Intercept)                                     | 5.504                                   | 0.259 | 21.300   |
| age                                             | 1.321                                   | 0.002 | 719.800  |
| bio5 <sub>t</sub>                               | 0.168                                   | 0.012 | 14.600   |
| bio5 <sub>t</sub> <sup>2</sup>                  | -0.719                                  | 0.006 | -118.000 |
| prec.jja <sub>p</sub>                           | 0.007                                   | 0.002 | 3.000    |
| prec.jja <sub>p</sub> <sup>2</sup>              | -0.004                                  | 0.001 | -4.800   |
| age <sup>2</sup>                                | -0.278                                  | 0.002 | -183.900 |
| age × bio5 <sub>t</sub>                         | 0.185                                   | 0.002 | 84.800   |
| age × prec.jja <sub>p</sub>                     | 0.005                                   | 0.001 | 4.300    |
| bio5 <sub>t</sub> × prec.jja <sub>p</sub>       | -0.006                                  | 0.002 | -2.400   |
| age × bio5 <sub>t</sub> × prec.jja <sub>p</sub> | 0.004                                   | 0.001 | 3.000    |
| CG                                              | 0.80                                    |       |          |
| MR <sup>2</sup>                                 | 0.69                                    |       |          |
| CR <sup>2</sup>                                 | 0.97                                    |       |          |

632

633 **Table 3.** Results from the linear fixed-effect models between phenotypic plasticity indices (P.I.) and the standard deviation climate variables (sd  
 634 bio). Three sub-tables are presented for each pine species, a), b) and c). Each sub-table shows the results for the two indices and the three  
 635 developmental classes (DC) analyzed. Developmental Class 1: green, DC. 2: orange and DC. 3: blue  
 636  
 637

a) *P. nigra*

| DC. 1 | Variable  | Estimate               | effect | p-value | R <sup>2</sup> | DC. 2     | Variable              | Estimate               | effect | p-value | R <sup>2</sup> | DC. 3                  | Variable  | Estimate               | effect | p-value | R <sup>2</sup> |
|-------|-----------|------------------------|--------|---------|----------------|-----------|-----------------------|------------------------|--------|---------|----------------|------------------------|-----------|------------------------|--------|---------|----------------|
| PP    | sd bio 1  | -5.11×10 <sup>-3</sup> | -      | ***     | 0.69           | PP        | sd bio 1              | -4.42×10 <sup>-3</sup> | -      | ***     | 0.70           | PP                     | sd bio 1  | 2.95×10 <sup>-3</sup>  | +      | ***     | 0.70           |
|       | sd bio5   | 6.46×10 <sup>-3</sup>  | +      | ***     |                |           | sd bio5               | 4.26×10 <sup>-3</sup>  | +      | ***     |                |                        | sd bio5   | -2.78×10 <sup>-3</sup> | -      | ***     |                |
|       | sd bio 13 | 5.68×10 <sup>-3</sup>  | +      | ***     |                |           | sd bio6               | 1.11×10 <sup>-3</sup>  | +      | n.s.    |                |                        | sd bio6   | -7.36×10 <sup>-4</sup> | -      | n.s.    |                |
|       | sd bio 14 | 2.94×10 <sup>-3</sup>  | +      | ***     |                |           | sd bio 13             | 4.06×10 <sup>-3</sup>  | +      | ***     |                |                        | sd bio 13 | -2.69×10 <sup>-3</sup> | -      | ***     |                |
| CV    | sd bio 1  | -7.43×10 <sup>-3</sup> | -      | ***     | 0.70           | CV        | sd bio 1              | -5.35×10 <sup>-3</sup> | -      | ***     | 0.70           | CV                     | sd bio 1  | 2.81×10 <sup>-3</sup>  | +      | ***     | 0.70           |
|       | sd bio5   | 7.09×10 <sup>-3</sup>  | +      | ***     |                |           | sd bio5               | 5.14×10 <sup>-3</sup>  | +      | ***     |                |                        | sd bio5   | -2.66×10 <sup>-3</sup> | -      | ***     |                |
|       | sd bio6   | 1.86×10 <sup>-3</sup>  | +      | n.s.    |                |           | sd bio6               | 1.30×10 <sup>-3</sup>  | +      | n.s.    |                |                        | sd bio6   | -7.30×10 <sup>-4</sup> | -      | n.s.    |                |
|       | sd bio 13 | 6.84×10 <sup>-3</sup>  | +      | ***     |                |           | sd bio 13             | 4.90×10 <sup>-3</sup>  | +      | ***     |                |                        | sd bio 13 | -2.54×10 <sup>-3</sup> | -      | ***     |                |
|       | sd bio 14 | 4.04×10 <sup>-3</sup>  | +      | ***     |                | sd bio 14 | 2.89×10 <sup>-3</sup> | +                      | ***    |         | sd bio 14      | -1.51×10 <sup>-3</sup> | -         | ***                    |        |         |                |

638 Variable refers to the explanatory variables of the model (standard deviation of the inter-annual climate variation in the 20<sup>th</sup> century). Estimate refers to the estimated  
 639 value for that variable. Effect makes reference whether the parameter estimate has a positive (+) or negative (-) impact on the phenotypic plasticity index. p-value  
 640 refers whether the Estimate is statistically significant with a p-value lower than 0.001 \*\*\*, 0.01 \*\*, 0.05 \*, 0.1 □ and 1 n.s. R<sup>2</sup> is the explained variance of the model.  
 641

642  
643 b) *P. pinaster*

|   | <b>C. 1</b> | <b>Variable</b> | <b>Estimate</b>        | <b>effect</b> | <b>p-value</b> | <b>R<sup>2</sup></b> | <b>DC. 2</b> | <b>Variable</b> | <b>Estimate</b>        | <b>effect</b> | <b>p-value</b> | <b>R<sup>2</sup></b> | <b>DC. 3</b> | <b>Variable</b> | <b>Estimate</b>        | <b>effect</b> | <b>p-value</b> | <b>R<sup>2</sup></b> |
|---|-------------|-----------------|------------------------|---------------|----------------|----------------------|--------------|-----------------|------------------------|---------------|----------------|----------------------|--------------|-----------------|------------------------|---------------|----------------|----------------------|
| P |             | sd bio 1        | -4.34×10 <sup>-3</sup> | -             | ***            |                      | PP           | sd bio 2        | -1.20×10 <sup>-3</sup> | -             | **             |                      | PP           | sd bio 2        | -8.59×10 <sup>-4</sup> | -             | **             |                      |
|   |             | sd bio 2        | -7.23×10 <sup>-4</sup> | -             | □              |                      |              | sd bio 5        | 1.70×10 <sup>-3</sup>  | +             | ***            |                      |              | sd bio 5        | 1.20×10 <sup>-3</sup>  | +             | ***            |                      |
|   |             | sd bio 5        | 3.83×10 <sup>-3</sup>  | +             | ***            |                      |              | sd bio 6        | -1.57×10 <sup>-3</sup> | -             | ***            |                      |              | sd bio 6        | -1.16×10 <sup>-3</sup> | -             | ***            |                      |
|   |             | sd bio 6        | -3.86×10 <sup>-3</sup> | -             | ***            |                      |              | sd bio 13       | 8.69×10 <sup>-3</sup>  | +             | ***            |                      |              | sd bio 13       | 6.33×10 <sup>-3</sup>  | +             | ***            |                      |
|   |             | sd bio 13       | 7.92×10 <sup>-3</sup>  | +             | ***            | 0.84                 |              | sd bio 14       | 7.65×10 <sup>-4</sup>  | +             | □              | 0.80                 |              | sd bio 14       | 5.82×10 <sup>-4</sup>  | +             | □              | 0.80                 |
| V |             | sd bio 1        | -4.30×10 <sup>-3</sup> | -             | ***            |                      | CV           | sd bio 2        | -1.39×10 <sup>-4</sup> | -             | **             |                      | CV           | sd bio 2        | -8.39×10 <sup>-4</sup> | -             | **             |                      |
|   |             | sd bio 2        | -7.74×10 <sup>-4</sup> | -             | n.s.           |                      |              | sd bio 5        | 2.14×10 <sup>-3</sup>  | +             | ***            |                      |              | sd bio 5        | 1.33×10 <sup>-3</sup>  | +             | ***            |                      |
|   |             | sd bio 5        | 4.43×10 <sup>-3</sup>  | +             | ***            |                      |              | sd bio 6        | -2.25×10 <sup>-3</sup> | -             | ***            |                      |              | sd bio 6        | -1.42×10 <sup>-3</sup> | -             | ***            |                      |
|   |             | sd bio 6        | -5.10×10 <sup>-3</sup> | -             | ***            |                      |              | sd bio 13       | 1.06×10 <sup>-2</sup>  | +             | ***            |                      |              | sd bio 13       | 6.52×10 <sup>-3</sup>  | +             | ***            |                      |
|   |             | sd bio 13       | 1.01×10 <sup>-2</sup>  | +             | ***            |                      |              | sd bio 14       | 8.40×10 <sup>-4</sup>  | +             | □              | 0.80                 |              | sd bio 14       | 4.86×10 <sup>-4</sup>  | +             | n.s.           |                      |
|   |             | sd bio 14       | 3.45×10 <sup>-3</sup>  | +             | ***            | 0.84                 |              |                 |                        |               |                |                      |              |                 |                        |               |                |                      |

644  
645 Variable refers to the explanatory variables of the model (standard deviation of the inter-annual climate variation in the 20<sup>th</sup> century). Estimate refers to the estimated  
646 value for that variable. Effect makes reference whether the parameter estimate has a positive (+) or negative (-) impact on the phenotypic plasticity index. p-value  
647 refers whether the Estimate is statistically significant with a p-value lower than 0.001 \*\*\*, 0.01 \*\*, 0.05 \*, 0.1 □ and 1 n.s. R<sup>2</sup> is the explained variance of the model.

648  
649  
650

c) *P. pinea*

| DC. 1 | Variable  | Estimate               | effect | p-value | R <sup>2</sup> | DC. 2 | Variable  | Estimate               | effect | p-value | R <sup>2</sup> | DC. 3 | Variable  | Estimate               | effect | p-value | R <sup>2</sup> |
|-------|-----------|------------------------|--------|---------|----------------|-------|-----------|------------------------|--------|---------|----------------|-------|-----------|------------------------|--------|---------|----------------|
| PP    | sd bio1   | -2.26×10 <sup>-5</sup> | -      | n.s.    |                | PP    | sd bio1   | -2.47×10 <sup>-5</sup> | -      | n.s.    |                | PP    | sd bio1   | 4.09×10 <sup>-5</sup>  | +      | □       |                |
|       | sd bio 5  | 1.08×10 <sup>-4</sup>  | +      | ***     |                |       | sd bio 5  | 9.69×10 <sup>-5</sup>  | +      | ***     |                |       | sd bio 5  | -1.44×10 <sup>-4</sup> | -      | ***     |                |
|       | sd bio 6  | 1.02×10 <sup>-4</sup>  | +      | ***     |                |       | sd bio 6  | 8.99×10 <sup>-5</sup>  | +      | ***     |                |       | sd bio 6  | -1.26×10 <sup>-4</sup> | -      | ***     |                |
|       | sd bio 14 | 9.99×10 <sup>-5</sup>  | +      | ***     | 0.76           |       | sd bio 14 | 9.07×10 <sup>-5</sup>  | +      | ***     | 0.71           |       | sd bio 14 | -1.23×10 <sup>-4</sup> | -      | ***     | 0.71           |
| CV    | sd bio1   | -6.40×10 <sup>-5</sup> | -      | □       |                | CV    | sd bio1   | -4.11×10 <sup>-5</sup> | -      | □       |                |       |           |                        |        |         |                |
|       | sd bio 5  | 2.43×10 <sup>-4</sup>  | +      | ***     |                |       | sd bio 5  | 1.50×10 <sup>-4</sup>  | +      | ***     |                |       |           |                        |        |         |                |
|       | sd bio 6  | 2.07×10 <sup>-4</sup>  | +      | ***     |                |       | sd bio 6  | 1.37×10 <sup>-4</sup>  | +      | ***     |                |       |           |                        |        |         |                |
|       | sd bio 14 | 2.21×10 <sup>-4</sup>  | +      | ***     | 0.73           |       | sd bio 14 | 1.40×10 <sup>-4</sup>  | +      | ***     | 0.75           |       |           |                        |        |         |                |

651  
652  
653  
654

Variable refers to the explanatory variables of the model (standard deviation of the inter-annual climate variation in the 20<sup>th</sup> century). Estimate refers to the estimated value for that variable. Effect makes reference whether the parameter estimate has a positive (+) or negative (-) impact on the phenotypic plasticity index. p-value refers whether the Estimate is statistically significant with a p-value lower than 0.001 \*\*\*, 0.01 \*\*, 0.05 \*, 0.1 □ and 1 n.s. R<sup>2</sup> is the explained variance of the model.

655 **Figures**  
656

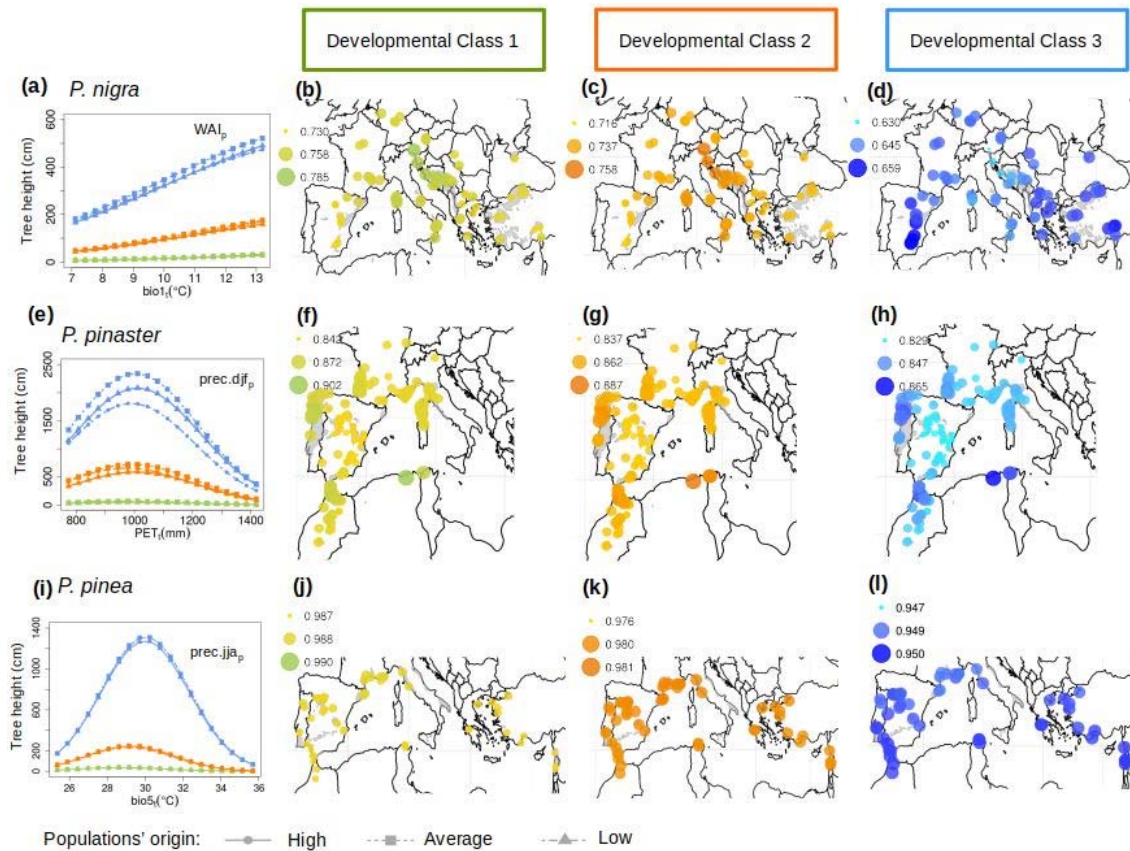

657  
658 **Figure 1.** Populations' phenotypic tree height responses across clim<sub>t</sub> particularized for three  
659 populations' origin (High, Average and Low in terms of clim<sub>p</sub> values) and for the three  
660 developmental classes, DC, (Developmental Class 1: green, DC. 2: orange and DC. 3: blue)  
661 for a) *P. nigra*, e) *P. pinaster* and i) *P. pinea*. Values of the phenotypic plasticity index (PP)  
662 for the three developmental classes across the species natural distribution ranges are shown.  
663 DC. 1: b), f) and j), DC. 2: c), g) and k); and DC. 3: d), h) and l).  
664

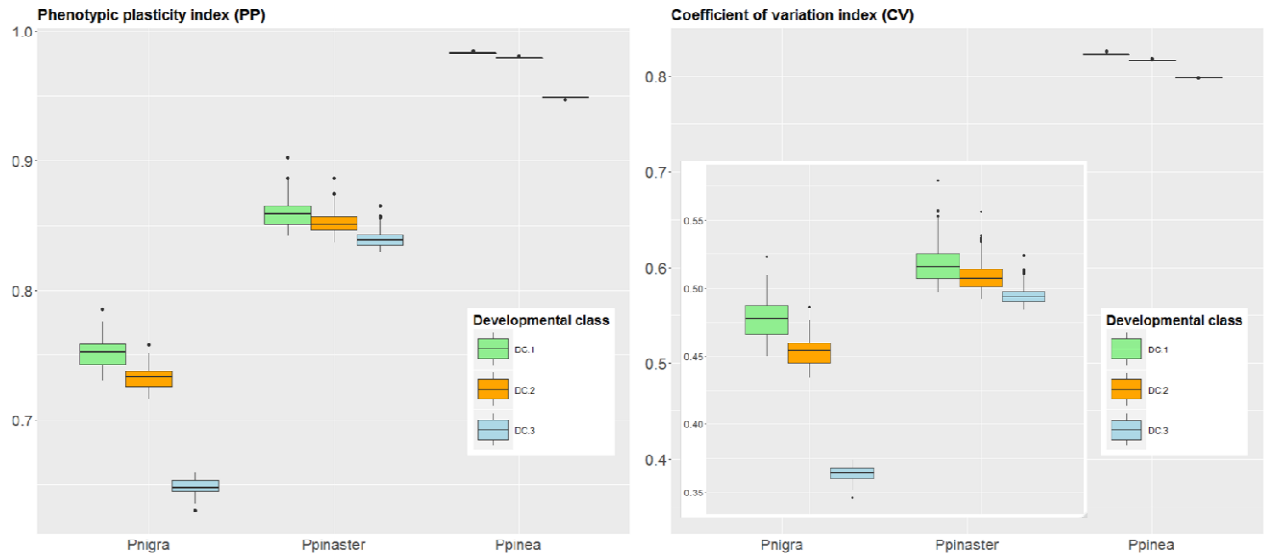

665  
666

667 **Figure 2.** Phenotypic plasticity values for the three species and for the three developmental  
668 classes, DC, (Developmental Class 1: green, DC. 2: orange and DC. 3: blue) for the two  
669 indices computed (PP and CV). An inset graph is included in the CV index as the values of *P.*  
670 *nigra* and *P. pinaster* are significantly smaller compared with those obtained in *P. pinea*.  
671  
672

673

### Phenotypic plasticity index (PP)

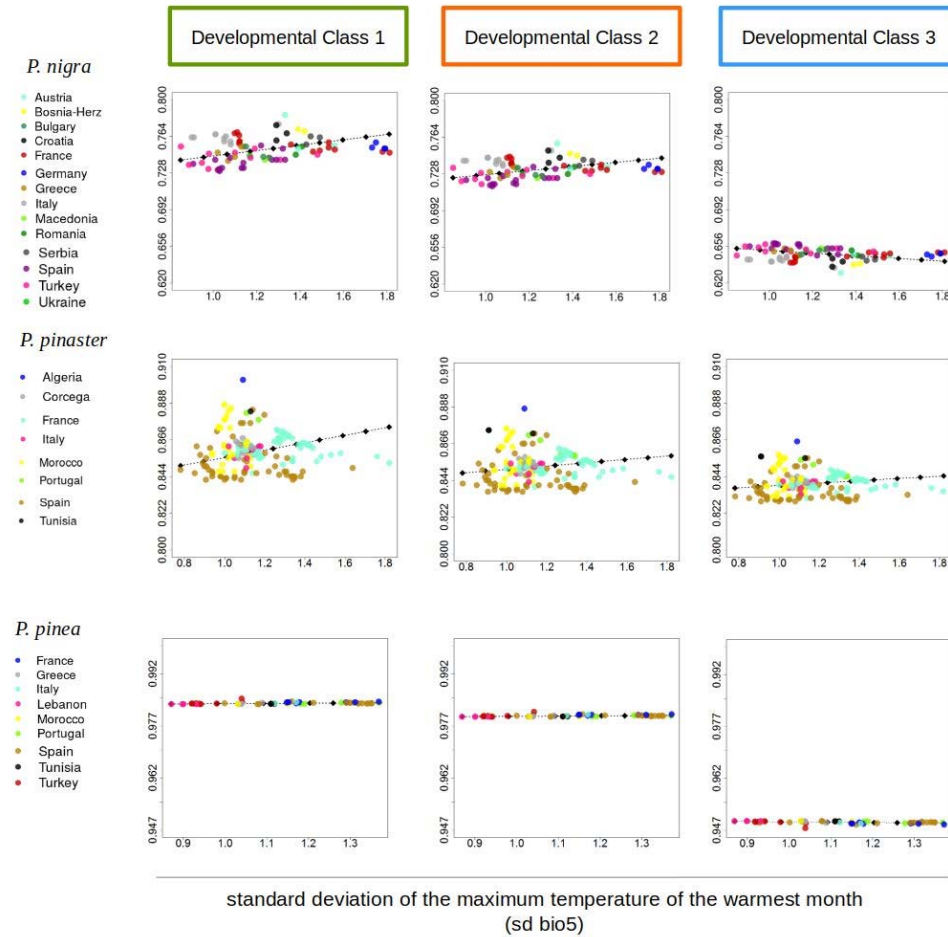

674

675

676

677

**Figure 3.** Phenotypic plasticity predictions of the PP index across the standard deviation of the maximum temperature of the warmest month (sd bio5) for the three developmental classes and pines species.

678 **Appendix S1.** Detailed description for climate variable selection.

679 We used two analysis to select the short-term climate related to the trial ( $clim_t$ ) and the long-  
680 term climate related to the climate at the population origin ( $clim_p$ ): i) linear mixed-effect  
681 models and ii) principal component analyses.

682 i) Linear Mixed-Effect Models

683 To select  $clim_t$ , we ran 21 linear mixed-effects models to analyse the response of tree height  
684 to each of the 21 climate variables to the climate of the trials (Table S1). To select  $clim_p$ , we  
685 ran 21 linear mixed-effects models to analyse the response of tree height to each of the 21  
686 climate variables to the climate at the populations' origin. Random effects included  
687 populations nested into blocks, and those nested within trials, and trees nested within  
688 population, block and trial, to control for differences among sites and populations, and to  
689 control for repeated measurements of the same trees, respectively. Fixed effects included tree  
690 age and the climate variable, including the linear and the quadratic forms, and the linear  
691 interaction between them. All climate variables were standardized (the mean was subtracted  
692 from each value and divided by the standard deviation). The model equation takes the form:

693 
$$H = \sum_{i=1}^p \alpha_i X_i + \varepsilon_{ran} + \varepsilon_{res} \quad \text{Eq. 1}$$

694 where  $H$  is tree height,  $\alpha_i$  is the set of  $p$  parameters associated with the main and interactive  
695 effects of  $X_i$  climate (either  $clim_t$  or  $clim_p$ ) and age variables,  $\varepsilon_{ran}$  is the variance component  
696 associated with the random terms, and  $\varepsilon_{res}$  is the residual distributed error.

697 We selected the model in which the climate variable met three requisites: 1) the  
698 sign of the estimated quadratic coefficient must be negative in order to get concave responses  
699 (maximum tree height is expected at intermediate climatic values, decreasing towards the  
700 extremes) 2) high absolute values of the estimated coefficients as an approach of the size  
701 effect of the climate variable on tree height, 3) being biological meaningful variable. For  
702 example, potential evapotranspiration climate variable can provide us with more information  
703 than just a variable of annual precipitation. Usually, curve responses between  $clim_t$  and tree  
704 height are more likely to be concaves than tree height with  $clim_p$  (personal observation from  
705 preliminary analysis). Therefore for  $clim_t$  we focused on the absolute highest value of the  
706 negative estimated parameter in the quadratic term when statistically significant, while for  
707  $clim_p$ , we focused on whether the linear and quadratic terms were statistically significant and  
708 then we chose among those variables with the absolute highest negative parameter in the  
709 quadratic term. If only the linear parameter was significant, then we chose the variable with  
710 the highest estimated parameter.



711 ii) Principal Component Analysis

712 We ran two independent principal component analyses (PCA) in R (R Core Team, 2016) for  
713  $clim_t$  and  $clim_p$  variables for each species. These analyses help selecting the variable which is  
714 highly representative of the climate variation covered by the data. We generally choose the  
715 climate variable that belongs to the first PCA axis, which captures a higher variance of the  
716 data. However, sometimes we needed to choose the climate variable from the second PCA  
717 axis if the climate variable is highly correlated with the first PCA axis.

718

719 These two complementary analyses were defined to facilitate climate selection, but this was  
720 not always straightforward.

721 **Appendix S2.** Description of the results from the linear mixed-effect models and principal  
722 component analyses to select the climate variables of  $\text{clim}_p$  and  $\text{clim}_t$ .

723 *P. nigra*. Mean annual temperature, bio1, was selected for  $\text{clim}_t$ . It showed the highest size  
724 effect among the total of the climate variables tested in the linear mixed-effect models (Table  
725 S2). Moreover, mean annual temperature was highly correlated with the first PCA axis (0.76)  
726 and showed a moderate-high contribution to the first axis (6.37% being the maximum 9.36%)  
727 (Figure S2). Annual water availability, WAI, was selected for  $\text{clim}_p$ . Although none of the  
728 tested climate variables in the linear mixed-effect models were statistically significant, the  
729 principal component analysis facilitated to choose it (Table S2). Thus, annual water  
730 availability was highly correlated with the first PCA axis (-0.93) and it showed the highest  
731 contribution to the first PCA axis, 8.33% (Figure S2).

732 *P. pinaster*. Annual potential evapotranspiration, PET, was selected for  $\text{clim}_t$ .  
733 Although precipitation of the driest month could have been selected for modeling, we chose  
734 annual potential evapotranspiration as it was statistically significant in the linear mixed-effect  
735 models and it integrates temperature and precipitation values which make this variables more  
736 informative (Table S2). Annual potential evapotranspiration was highly correlated with the  
737 first PCA axis (0.94), and it showed the second highest contribution (7.57%) to this axis after  
738 summer daily mean temperature (Figure S2). Winter precipitation,  $\text{prec.djf}$ , was selected for  
739  $\text{clim}_p$ . It was statistically significant in the linear mixed-effect models, and the two estimated  
740 coefficients were biologically meaningful and their size effects were the highest (Table S2).  
741 The variable of winter precipitation was moderate-to-highly correlated with the second PCA  
742 axis (0.76), with a moderate-to-high contribution to the axis (8.21%, being the maximum  
743 contribution of 12.55%) (Figure S2). The second axis of the PCA explained nearly the same  
744 amount of variability, 33.38%, compared to the variance explained by the first axis of  
745 45.19%.

746 *P. pinea*. Maximum temperature of the warmest month, bio5, was selected to  
747 represent  $\text{clim}_t$ . It showed the highest size effect on the estimated quadratic term in the linear  
748 mixed-effect models. Moreover, maximum temperature of the warmest month was highly  
749 correlated with the first PCA axis (-0.91) and it showed a moderate-to-high high contribution  
750 to the first axis of the PCA (6.88%, being the maximum 7.86%) (Figure S2). Summer  
751 precipitation was selected to represent  $\text{clim}_p$ . Both of the terms estimated, the linear and the  
752 quadratic terms, were statistically significant. The linear and quadratic terms were  
753 statistically significant. Moreover, summer precipitation was moderately correlated with the

754 second PCA axis (-0.59) and it showed a moderate contribution to the axis (4.91%, being the  
755 maximum 11.51%) (Figure S2). The second axis of the PCA explained nearly the same  
756 amount of variability, 33.3% compared to 38.83%.

757

758 **Appendix S3.** Populations' with a Cook's distance value above one.

759 The Cook's distance measures the effect of deleting a given population due to the presence of  
760 large residuals that can influence the accuracy of the model. We removed those populations  
761 from the linear-fixed effect models. Specifically, in *P. nigra* we deleted the population of  
762 Parapluberg in the three developmental classes (DC.1, DC. 2 and DC.3). In *P. pinaster*, we  
763 deleted four populations (the population of Val Freda in DC. 3, and the populations of Ain  
764 Baccouche, Tabarka and Valencia in DC. 1). In *P. pinea*, we deleted the population of Artvin  
765 in DC1, DC2 and DC3.

## 766 **Supporting Information**

767 **Table S1.** Climatic variables used from the EuMedClim (Fréjaville & Benito Garzón, 2018).

768 **Table S2.** Results from linear mixed-effect models to select the climate variables of  $clim_p$   
769 and  $clim_t$ . Bold letters indicate the selected variables. Complementary results from the  
770 Principal Component Analyses are shown in Figure S2

771 **Table S3.** Variance inflator factors (VIF) of the best-supported model for each pine species  
772 analyzed.

773 **Table S4.** Mean and standard deviation values for each phenotypic plasticity index. Analysis  
774 of the variance and post-hoc analyses adjusted by Tukey HSD were performed to test  
775 differences among developmental classes (DC).

776 **Table S5.** Results from the analysis of the variance to test phenotypic plasticity variation  
777 across developmental classes (DC) and for each pine species.

778

779

780 **Figure S1.** Maps showing the trials, provenances and natural distribution of the three species.  
781 Red triangles represent the common gardens (trials) and light blue circles the provenances.  
782 The light green area represents the natural distribution of the species according to  
783 EUFORGEN (<http://www.euforgen.org/>). Top left: *Pinus nigra*, top right: *Pinus pinaster*,  
784 bottom left: *Pinus pinea*. Adapted from Vizcaíno-Palomar *et al.*, (2019).

785 **Figure S2.** Plots of principal component analyses (PCA) for the short-term climate ( $clim_t$ )  
786 and the long-term climate ( $clim_p$ ). These results are complementary to the linear mixed-effect  
787 model results shown in Appendix S2.

788 **Figure S3.** Plots of residuals of the best-supported model for tree height. Figures show the  
789 residuals across age,  $clim_t$  and  $clim_p$  in standardized values. a) *P. nigra*, b) *P. pinaster*, and c)  
790 *P. pinea*.

791 **Figure S4.** Populations' phenotypic tree height responses across  $clim_t$  particularized for three  
792 populations' origin (High, Average and Low in terms of  $clim_p$  values) and for the three  
793 developmental classes, DC, (Developmental Class 1: green, DC. 2: orange and DC. 3: blue)  
794 for a) *P. nigra*, e) *P. pinaster* and i) *P. pinea*. Values of the coefficient of variation index (CV)  
795 for the three developmental classes across the species natural distribution ranges are shown.  
796 DC. 1: b), f) and j), DC. 2: c), g) and k); and DC. 3: d), h) and i).

797 **Figure S5.** Phenotypic plasticity predictions of the CV index across the standard deviation of  
798 the maximum temperature of the warmest month (sd bio5) for the three developmental  
799 classes and pines species.

800

801 **Table S1.** Climatic variables used from the EuMedClim (Fréjaville & Benito Garzón, 2018).

| <b>Annual climate variables</b>   |                      |                                                 |
|-----------------------------------|----------------------|-------------------------------------------------|
| <b>Number</b>                     | <b>Variable name</b> | <b>Description</b>                              |
| <b>1</b>                          | bio1                 | annual daily mean temperature (° C)             |
| <b>2</b>                          | bio2                 | mean diurnal temperature range (max-min, ° C)   |
| <b>3</b>                          | bio5                 | maximum temperature of the warmest month, (° C) |
| <b>4</b>                          | bio6                 | minimum temperature of the coldest month (° C)  |
| <b>5</b>                          | bio12                | annual precipitation (mm)                       |
| <b>6</b>                          | bio13                | precipitation of the wettest month (mm)         |
| <b>7</b>                          | bio14                | precipitation of the driest month (mm)          |
| <b>8</b>                          | PET                  | annual potential evapotranspiration [PET] (mm)  |
| <b>9</b>                          | WAI                  | water availability [bio12- PET] (mm)            |
| <b>Seasonal climate variables</b> |                      |                                                 |
| <b>Number</b>                     | <b>Variable name</b> | <b>Description</b>                              |
| <b>10</b>                         | tmean.djf            | winter daily mean temperature (° C)             |
| <b>11</b>                         | tmean.mam            | spring daily mean temperature (° C)             |
| <b>12</b>                         | tmean.jja            | summer daily mean temperature (° C)             |
| <b>13</b>                         | tmean.son            | autumn daily mean temperature (° C)             |
| <b>14</b>                         | prec.djf             | winter precipitation (mm)                       |
| <b>15</b>                         | prec.mam             | spring precipitation (mm)                       |
| <b>16</b>                         | prec.jja             | summer precipitation (mm)                       |
| <b>17</b>                         | prec.son             | autumn precipitation (mm)                       |
| <b>18</b>                         | PET.min              | PET of the wettest month (mm)                   |
| <b>19</b>                         | PET.max              | PET of the driest month (mm)                    |
| <b>20</b>                         | WAI.min              | WAI of the driest month (mm)                    |
| <b>21</b>                         | WAI.max              | WAI of the wettest month (mm)                   |

802

803 **Table S2.** Results from linear mixed-effect models to select the climate variables of  $clim_p$   
 804 and  $clim_t$ . Bold letters indicate the selected variables. Complementary results from the  
 805 Principal Component Analyses are shown in Figure S2  
 806

| <i>Pinus nigra</i>      | Short term climate effects |                | Long term climate effects |              |              |                   |              |
|-------------------------|----------------------------|----------------|---------------------------|--------------|--------------|-------------------|--------------|
| Variable                | coef <sup>2</sup>          | t value        | Variable                  | coef         | t value      | coef <sup>2</sup> | t value      |
| <b>bio1<sub>t</sub></b> | <b>-0.24</b>               | <b>-112.12</b> | prec.jja <sub>p</sub>     | 0.00         | -0.01        | -0.04             | -0.28        |
| tmean.djf <sub>t</sub>  | -0.20                      | -140.38        | PET <sub>p</sub>          | -0.02        | -0.12        | -0.03             | -0.19        |
| PET.min <sub>t</sub>    | -0.13                      | -45.51         | WAI.min <sub>p</sub>      | -0.02        | -0.08        | -0.02             | -0.14        |
| bio6 <sub>t</sub>       | -0.10                      | -127.72        | bio5 <sub>p</sub>         | -0.02        | -0.11        | -0.02             | -0.18        |
| prec.jja <sub>t</sub>   | -0.08                      | -84.68         | PET.max <sub>p</sub>      | -0.01        | -0.07        | -0.02             | -0.10        |
| prec.son <sub>t</sub>   | -0.07                      | -180.30        | <b>WAI<sub>p</sub></b>    | <b>-0.01</b> | <b>-0.03</b> | <b>-0.01</b>      | <b>-0.08</b> |
| bio14 <sub>t</sub>      | -0.03                      | -149.63        | bio2 <sub>p</sub>         | -0.02        | -0.09        | -0.01             | -0.06        |
| tmean.son <sub>t</sub>  | -0.03                      | -19.31         | prec.djf <sub>p</sub>     | -0.05        | -0.20        | -0.01             | -0.08        |
| bio13 <sub>t</sub>      | -0.01                      | -29.53         | tmean.jja <sub>p</sub>    | -0.02        | -0.09        | -0.01             | -0.12        |
| pet.max <sub>t</sub>    | -0.01                      | -11.58         | prec.son <sub>p</sub>     | 0.00         | 0.00         | -0.01             | -0.04        |
| WAI.min <sub>t</sub>    | -0.01                      | -9.42          | WAI.max <sub>p</sub>      | -0.07        | -0.27        | -0.01             | -0.05        |
| tmean.jja <sub>t</sub>  | 0.01                       | 10.06          | bio13 <sub>p</sub>        | -0.05        | -0.19        | -0.01             | -0.05        |
| prec.mam <sub>t</sub>   | 0.01                       | 22.98          | tmean.son <sub>p</sub>    | 0.01         | 0.04         | -0.01             | -0.06        |
| bio5 <sub>t</sub>       | 0.02                       | 28.96          | bio1 <sub>p</sub>         | 0.01         | 0.07         | 0.00              | -0.05        |
| bio12 <sub>t</sub>      | 0.02                       | 65.66          | tmean.djf <sub>p</sub>    | 0.06         | 0.31         | 0.00              | -0.01        |
| WAI <sub>t</sub>        | 0.03                       | 72.89          | tmean.mam <sub>p</sub>    | -0.01        | -0.05        | 0.00              | 0.00         |
| PET <sub>t</sub>        | 0.04                       | 28.05          | bio6 <sub>p</sub>         | 0.05         | 0.26         | 0.00              | 0.00         |
| prec.djf <sub>t</sub>   | 0.05                       | 100.84         | prec.mam <sub>p</sub>     | -0.01        | -0.04        | 0.00              | 0.00         |
| tmean.mam <sub>t</sub>  | 0.05                       | 41.13          | bio12 <sub>p</sub>        | -0.05        | -0.20        | 0.01              | 0.03         |
| bio2 <sub>t</sub>       | 0.13                       | 92.50          | PET.min <sub>p</sub>      | 0.04         | 0.16         | 0.01              | 0.04         |
| WAI.max <sub>t</sub>    | 0.13                       | 211.40         | bio14 <sub>p</sub>        | -0.04        | -0.18        | 0.03              | 0.12         |

807

808

| <i>Pinus pinaster</i>  | Short term climate effects |               | Long term climate effects   |              |             |                   |               |
|------------------------|----------------------------|---------------|-----------------------------|--------------|-------------|-------------------|---------------|
| Variable               | coef <sup>2</sup>          | t value       | Variable                    | coef         | t value     | coef <sup>2</sup> | t value       |
| bio14 <sub>t</sub>     | -79.13                     | -77.05        | <b>prec.djf<sub>p</sub></b> | <b>92.89</b> | <b>5.83</b> | <b>-116.90</b>    | <b>-15.43</b> |
| <b>PET<sub>t</sub></b> | <b>-62.09</b>              | <b>-37.09</b> | bio13 <sub>p</sub>          | 124.55       | 10.02       | -95.65            | -13.56        |
| WAI <sub>t</sub>       | -40.50                     | -34.15        | bio2 <sub>p</sub>           | 58.20        | 5.07        | -75.43            | -11.05        |
| WAI.max <sub>t</sub>   | -28.87                     | -52.10        | PET.max <sub>p</sub>        | 101.64       | 7.73        | -84.34            | -9.88         |

| <i>Pinus pinaster</i>  |        | Short term climate effects |                        | Long term climate effects |         |        |         |
|------------------------|--------|----------------------------|------------------------|---------------------------|---------|--------|---------|
| Variable               | coef^2 | t value                    | Variable               | coef                      | t value | coef^2 | t value |
| tmean.son <sub>t</sub> | -25.77 | -21.76                     | prec.mam <sub>p</sub>  | 75.40                     | 6.56    | -37.47 | -6.85   |
| bio2 <sub>t</sub>      | -17.74 | -27.77                     | prec.jja <sub>p</sub>  | 163.64                    | 14.18   | -42.90 | -6.05   |
| WAI.min <sub>t</sub>   | -15.79 | -24.15                     | bio6 <sub>p</sub>      | 5.58                      | 0.47    | -36.23 | -5.04   |
| bio5 <sub>t</sub>      | -11.70 | -6.69                      | WAI.max <sub>p</sub>   | 83.98                     | 7.58    | -26.93 | -3.66   |
| bio12 <sub>t</sub>     | -7.56  | -9.46                      | prec.son <sub>p</sub>  | 35.45                     | 3.26    | -33.29 | -3.21   |
| prec.djf <sub>t</sub>  | -4.04  | -14.02                     | bio14 <sub>p</sub>     | 123.28                    | 8.70    | -14.10 | -1.89   |
| PET.min <sub>t</sub>   | 3.78   | 1.71                       | WAI <sub>p</sub>       | 52.54                     | 5.85    | -12.40 | -1.55   |
| bio13 <sub>t</sub>     | 5.18   | 15.19                      | bio12 <sub>p</sub>     | 54.79                     | 5.45    | -10.01 | -1.25   |
| bio6 <sub>t</sub>      | 10.16  | 13.75                      | PET <sub>p</sub>       | -39.41                    | -4.07   | -6.07  | -0.97   |
| prec.son <sub>t</sub>  | 11.66  | 49.06                      | tmean.son <sub>p</sub> | 22.65                     | 1.78    | -3.60  | -0.47   |
| PET.max <sub>t</sub>   | 12.06  | 21.90                      | PET.min <sub>p</sub>   | -70.27                    | -5.89   | -0.67  | -0.11   |
| tmean.djf <sub>t</sub> | 13.18  | 10.17                      | tmean.djf <sub>p</sub> | 29.28                     | 2.29    | -0.40  | -0.05   |
| prec.mam <sub>t</sub>  | 14.62  | 27.30                      | WAI.min <sub>p</sub>   | 64.09                     | 7.41    | 2.43   | 0.32    |
| prec.jja <sub>t</sub>  | 18.26  | 15.69                      | bio5 <sub>p</sub>      | 321.98                    | 15.39   | 28.08  | 2.16    |
| tmean.jja <sub>t</sub> | 62.56  | 31.59                      | bio1 <sub>p</sub>      | 49.67                     | 3.57    | 21.93  | 2.87    |
| tmean.mam <sub>t</sub> | 89.81  | 71.02                      | tmean.mam <sub>p</sub> | 63.97                     | 4.65    | 24.23  | 3.20    |
| bio1 <sub>t</sub>      | 142.09 | 56.23                      | tmean.jja <sub>p</sub> | 333.48                    | 13.47   | 148.08 | 9.88    |

809

| <i>Pinus pinea</i>      |                | Short term climate effects |                             | Long term climate effects |             |              |              |
|-------------------------|----------------|----------------------------|-----------------------------|---------------------------|-------------|--------------|--------------|
| Variable                | coef^2         | t value                    | Variable                    | coef                      | t value     | coef^2       | t value      |
| <b>bio5<sub>t</sub></b> | <b>-181.07</b> | <b>-152.89</b>             | pet.mean <sub>p</sub>       | 0.38                      | 0.21        | -2.23        | -2.43        |
| prec.son <sub>t</sub>   | -99.92         | -76.75                     | bio5 <sub>p</sub>           | -1.61                     | -0.80       | -2.07        | -1.91        |
| pet.min <sub>t</sub>    | -54.20         | -29.40                     | <b>prec.jja<sub>p</sub></b> | <b>4.67</b>               | <b>1.96</b> | <b>-1.88</b> | <b>-2.39</b> |
| tmean.jja <sub>t</sub>  | -49.02         | -67.42                     | PET.max <sub>p</sub>        | 0.68                      | 0.33        | -1.34        | -0.96        |
| bio1 <sub>t</sub>       | -21.73         | -24.04                     | WAI.min <sub>p</sub>        | -0.43                     | -0.20       | -1.33        | -1.03        |
| bio6 <sub>t</sub>       | -17.76         | -35.58                     | bio14 <sub>p</sub>          | 2.99                      | 1.09        | -1.14        | -1.64        |
| bio14 <sub>t</sub>      | -11.35         | -26.11                     | tmean.jja <sub>p</sub>      | -4.86                     | -2.47       | -1.08        | -0.75        |
| tmean.son <sub>t</sub>  | -9.99          | -16.22                     | tmean.mam <sub>p</sub>      | -5.34                     | -2.91       | -0.66        | -0.46        |
| tmean.mam <sub>t</sub>  | -9.29          | -16.19                     | tmean.djf <sub>p</sub>      | -5.26                     | -2.87       | -0.36        | -0.19        |
| PET.max <sub>t</sub>    | -7.60          | -12.53                     | PET.min <sub>p</sub>        | -2.05                     | -0.97       | -0.34        | -0.44        |
| WAI.min <sub>t</sub>    | 2.66           | 9.36                       | bio6 <sub>p</sub>           | -5.23                     | -2.68       | 0.21         | 0.10         |
| prec.mam <sub>t</sub>   | 5.11           | 13.96                      | bio2 <sub>p</sub>           | 3.25                      | 1.52        | 0.29         | 0.16         |
| bio13 <sub>t</sub>      | 7.00           | 10.69                      | bio1 <sub>p</sub>           | -5.87                     | -3.20       | 0.54         | 0.31         |
| prec.djf <sub>t</sub>   | 12.97          | 45.43                      | WAI <sub>p</sub>            | -5.80                     | -2.90       | 1.80         | 1.28         |
| WAI.max <sub>t</sub>    | 22.84          | 38.69                      | prec.son <sub>p</sub>       | -9.19                     | -3.92       | 2.59         | 2.26         |



| <i>Pinus pinea</i>     | Short term climate effects |         | Long term climate effects |        |         |                   |         |
|------------------------|----------------------------|---------|---------------------------|--------|---------|-------------------|---------|
| Variable               | coef <sup>2</sup>          | t value | Variable                  | coef   | t value | coef <sup>2</sup> | t value |
| prec.jja <sub>t</sub>  | 25.26                      | 84.43   | tmean.son <sub>p</sub>    | -7.19  | -4.05   | 3.71              | 2.13    |
| tmean.djf <sub>t</sub> | 35.07                      | 47.88   | prec.mam <sub>p</sub>     | -7.98  | -3.36   | 3.84              | 2.59    |
| bio2 <sub>t</sub>      | 38.08                      | 20.62   | bio12 <sub>p</sub>        | -9.18  | -4.64   | 4.60              | 3.16    |
| PET <sub>t</sub>       | 57.09                      | 26.45   | bio13 <sub>p</sub>        | -13.95 | -6.45   | 8.76              | 5.41    |
| bio12 <sub>t</sub>     | 74.68                      | 88.44   | ppet.max <sub>p</sub>     | -14.19 | -6.45   | 9.41              | 5.28    |
| WAI <sub>t</sub>       | 81.80                      | 66.39   | prec.djf <sub>p</sub>     | -15.37 | -6.54   | 9.61              | 5.70    |

810

811 **Table S3.** Variance inflator factors (VIF) of the best-supported model for each pine species  
 812 analyzed.

| <i>Pinus nigra</i>                         |     | <i>Pinus pinaster</i>                             |     | <i>Pinus pinea</i>                                 |     |
|--------------------------------------------|-----|---------------------------------------------------|-----|----------------------------------------------------|-----|
| Variable                                   | VIF | Variable                                          | VIF | Variable                                           | VIF |
| age                                        | 5   | age                                               | 2   | age                                                | 2   |
| bio1 <sub>t</sub>                          | 1   | PET <sub>t</sub>                                  | 2   | bio5 <sub>t</sub>                                  | 2   |
| bio1 <sub>t</sub> <sup>2</sup>             | 2   | PET <sub>t</sub> <sup>2</sup>                     | 2   | bio5 <sub>t</sub> <sup>2</sup>                     | 4   |
| age <sup>2</sup>                           | 5   | prec.djf <sub>p</sub>                             | 2   | prec.jja <sub>p</sub>                              | 2   |
| WAI <sub>p</sub>                           | 1   | prec.djf <sub>p</sub> <sup>2</sup>                | 2   | prec.jja <sub>p</sub> <sup>2</sup>                 | 2   |
| WAI <sub>p</sub> <sup>2</sup>              | 1   | age <sup>2</sup>                                  | 2   | age <sup>2</sup>                                   | 2   |
| age × bio1 <sub>t</sub>                    | 3   | age × PET <sub>t</sub>                            | 1   | age × bio5 <sub>t</sub>                            | 4   |
| age × WAI <sub>p</sub>                     | 3   | age × prec.djf <sub>p</sub>                       | 1   | age × prec.jja <sub>p</sub>                        | 1   |
| bio1 <sub>t</sub> × WAI <sub>p</sub>       | 1   | PET <sub>t</sub> × prec.djf <sub>p</sub>          | 1   | bio5 <sub>t</sub> × prec.jja <sub>p</sub>          | 1   |
| age × bio1 <sub>t</sub> × WAI <sub>p</sub> | 3   | age × PET <sub>t</sub> ×<br>prec.djf <sub>p</sub> | 1   | age × bio5 <sub>t</sub> ×<br>prec.jja <sub>p</sub> | 1   |

813 **Table S4.** Mean and standard deviation values for each phenotypic plasticity index are shown.  
 814 Analysis of variance and post-hoc analyses adjusted by Tukey HSD were performed to test  
 815 differences among developmental classes (DC).  
 816

|                    |     | DC. 1 |                    | DC. 2 |                    | DC. 3 |                    |
|--------------------|-----|-------|--------------------|-------|--------------------|-------|--------------------|
|                    | P.I | mean  | standard deviation | mean  | standard deviation | mean  | standard deviation |
| <i>P. nigra</i>    | PP  | 0.75a | 0.012              | 0.73b | 0.009              | 0.65c | 0.006              |
|                    | CV  | 0.48a | 0.015              | 0.45b | 0.011              | 0.36c | 0.006              |
| <i>P. pinaster</i> | PP  | 0.86a | 0.011              | 0.85b | 0.001              | 0.84c | 0.007              |
|                    | CV  | 0.52a | 0.015              | 0.51b | 0.012              | 0.50c | 0.007              |
| <i>P. pinea</i>    | PP  | 0.98a | 0.000              | 0.98b | 0.000              | 0.95c | 0.000              |
|                    | CV  | 0.82a | 0.000              | 0.82b | 0.000              | 0.80c | 0.000              |

817 a, b and c (from the highest to the lowest) mean that mean values of phenotypic plasticity values are  
 818 statistically different among developmental stages for each index analyzed.

819

820 **Table S5.** Results from the analysis of the variance to test phenotypic plasticity variation across  
 821 developmental classes (DC) and for each pine species.

822

|                       |           |               |          |                |     |
|-----------------------|-----------|---------------|----------|----------------|-----|
| <i>Pinus nigra</i>    | <b>df</b> | <b>Sum Sq</b> | <b>F</b> | <b>p value</b> |     |
| PP index (DC)         | 2         | 0.478         | 2865.9   | < 2.2e-16      | *** |
| Residuals             | 234       | 0.020         |          |                |     |
| CV index (DC)         | 2         | 0.569         | 2244.6   | < 2.2e-16      | *** |
| Residuals             | 234       | 0.030         |          |                |     |
|                       |           |               |          |                |     |
| <i>Pinus pinaster</i> | <b>df</b> | <b>Sum Sq</b> | <b>F</b> | <b>p value</b> |     |
| PP index (DC)         | 2         | 0.036         | 209.59   | < 2.2e-16      | *** |
| Residuals             | 552       | 0.048         |          |                |     |
| CV index (DC)         | 2         | 0.048         | 183.01   | < 2.2e-16      | *** |
| Residuals             | 552       | 0.073         |          |                |     |
|                       |           |               |          |                |     |
| <i>Pinus pinea</i>    | <b>df</b> | <b>Sum Sq</b> | <b>F</b> | <b>p value</b> |     |
| PP index (DC)         | 2         | 0             | 212713   | < 2.2e-16      | *** |
| Residuals             | 162       | 0             |          |                |     |
| CV index (DC)         | 2         | 0.017         | 45936    | < 2.2e-16      | *** |

|           |     |   |  |  |  |
|-----------|-----|---|--|--|--|
| Residuals | 162 | 0 |  |  |  |
|-----------|-----|---|--|--|--|

823 df: degrees of freedom, Sum Sq means sum of squares, *F*-test, \*\*\* for p values < 0.001

824

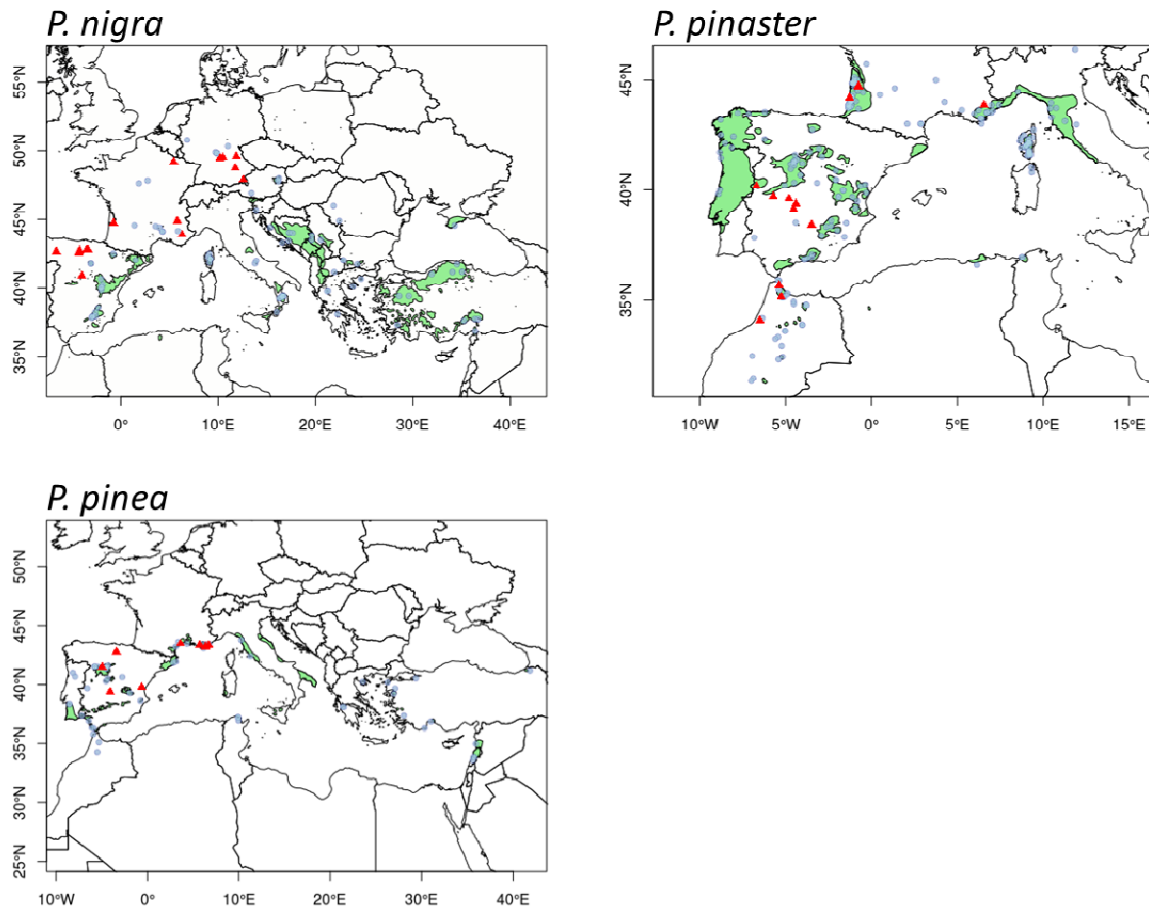

825

826

827 **Figure S1.** Maps showing the trials, provenances and natural distribution of the three species. Red  
828 triangles represent the common gardens (trials) and light blue circles the provenances. The light  
829 green area represents the natural distribution of the species according to EUFORGEN  
830 (<http://www.euforgen.org/>). Top left: *Pinus nigra*, top right: *Pinus pinaster*, bottom left: *Pinus*  
831 *pinea*. Adapted from Vizcaíno-Palomar *et al.*, (2019).

832

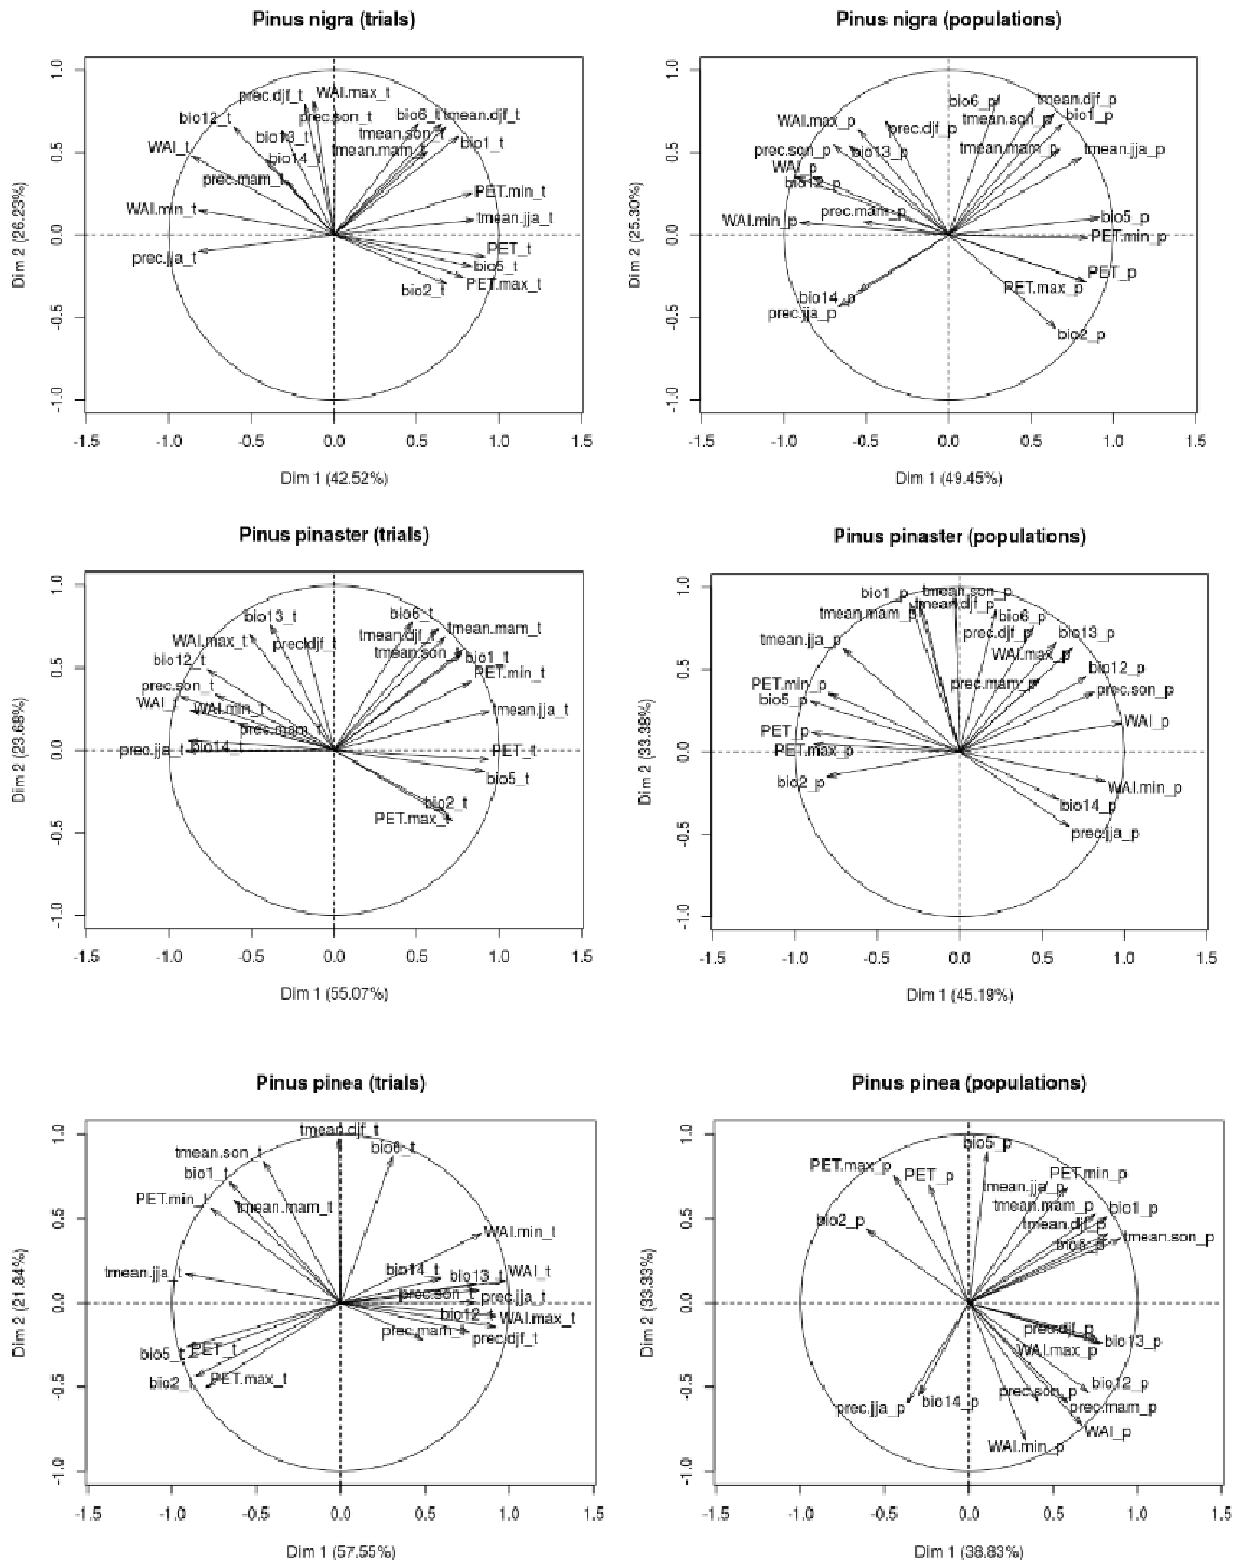

833

834

835 **Figure S2.** Plots of principal component analyses (PCA) for the short-term climate (clim<sub>t</sub>) and the  
 836 long-term climate (clim<sub>p</sub>). These results are complementary to the linear mixed-effect model results  
 837 shown in Appendix S2.

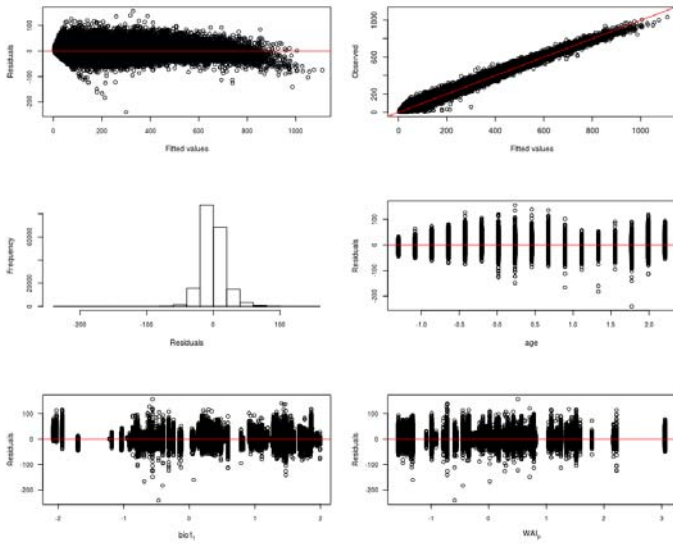

- 838 a)
- 839 b)
- 840 c)

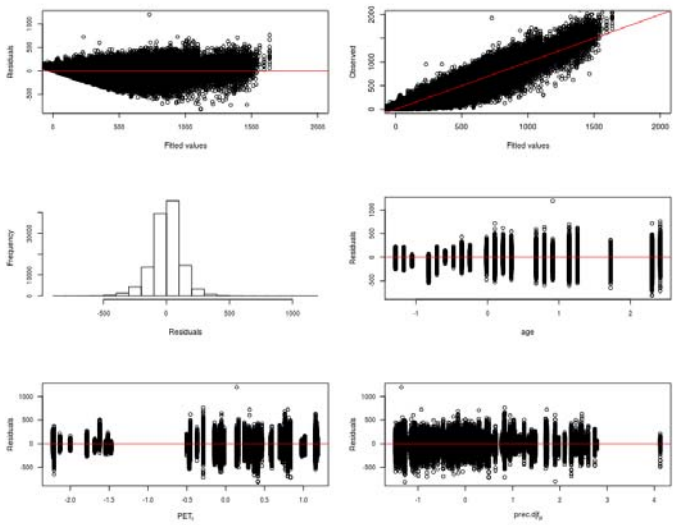

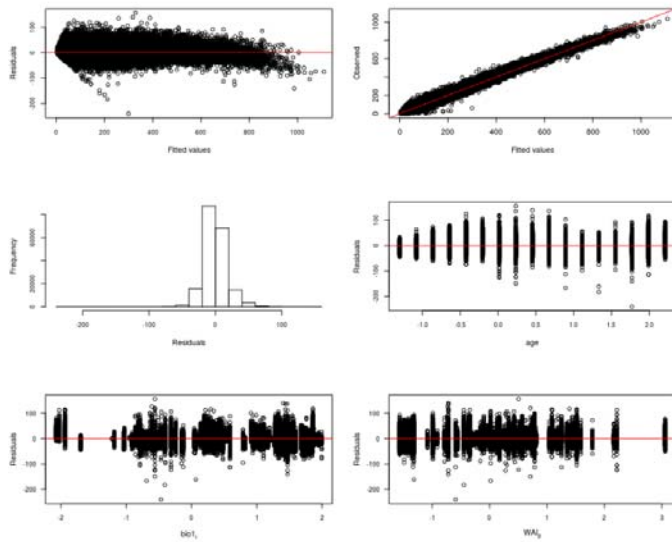

841

842 **Figure S3.** Plots of residuals of the best-supported model for tree height. Figures show the residuals

843 across age,  $\text{clim}_t$  and  $\text{clim}_p$  in standardized values. a) *P. nigra*, b) *P. pinaster*, and c) *P. pinea*.



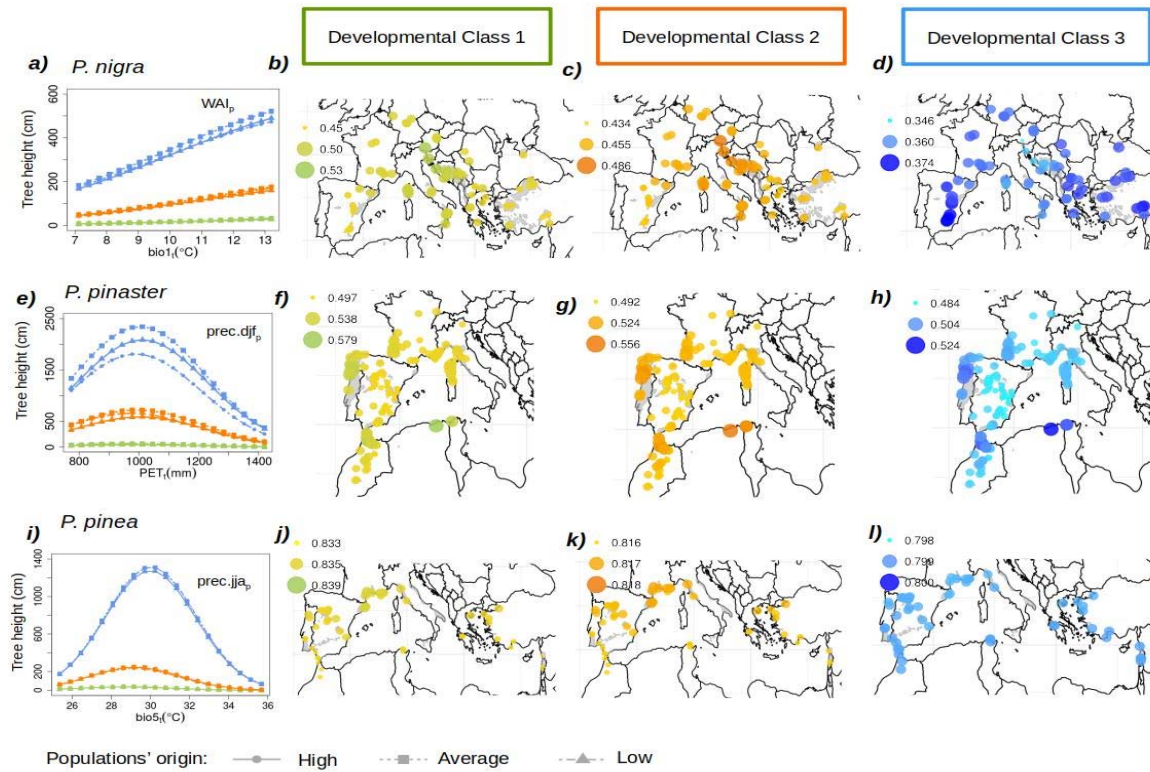

845 **Figure S4.** Populations' phenotypic tree height responses across  $clim_t$  particularized for three populations' origin (High, Average and Low in terms of  
 846  $clim_p$  values) and for the three developmental classes, DC, (Developmental Class 1: green, DC. 2: orange and DC. 3: blue) for a) *P. nigra*, e) *P.*  
 847 *pinaster* and i) *P. pinea*. Values of the coefficient of variation index (CV) for the three developmental classes across the species natural distribution  
 848 ranges are shown. DC. 1: b), f) and j), DC. 2: c), g) and k); and DC. 3: d), h) and i).

### Coefficient of variation index (CV)

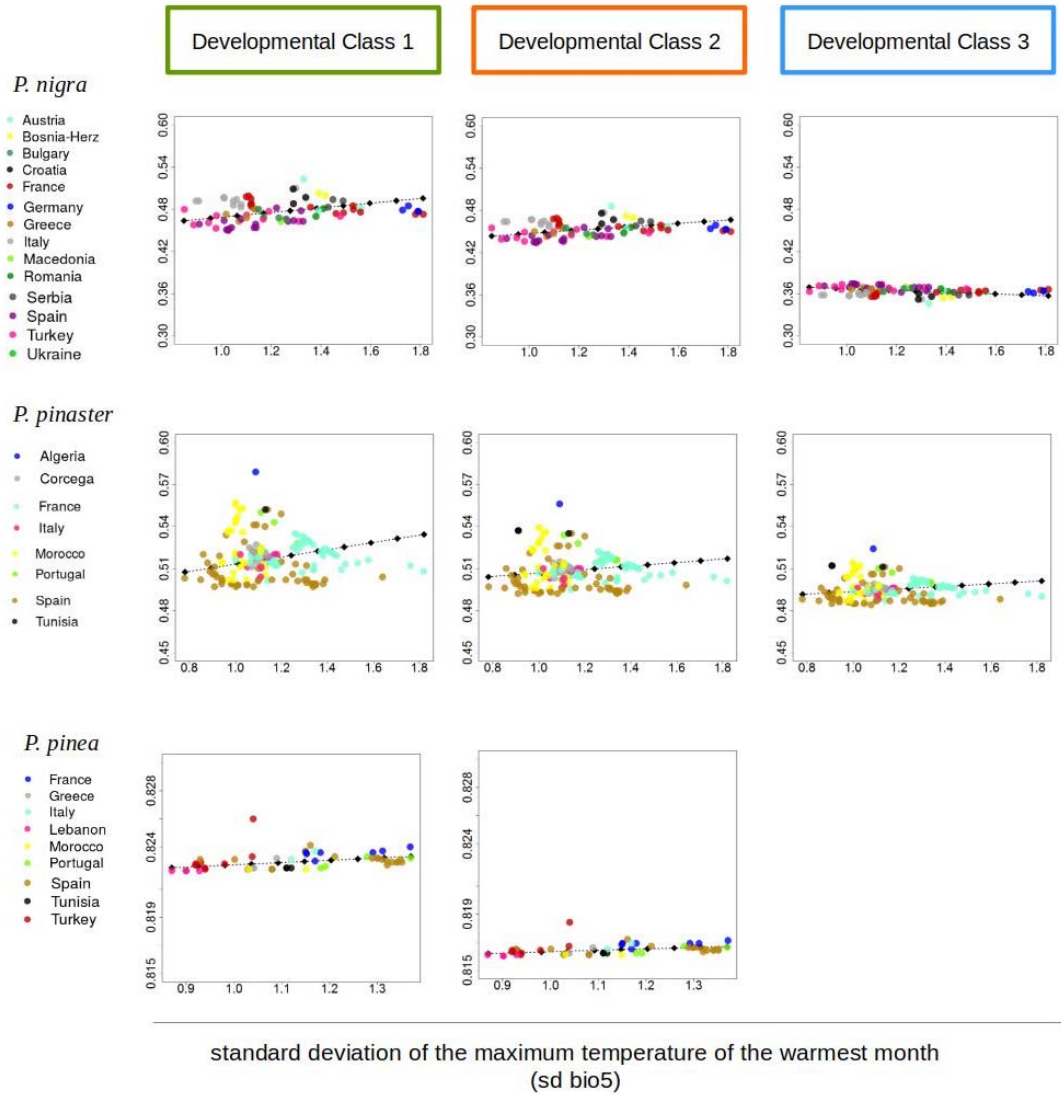

849

850 **Figure S5.** Phenotypic plasticity predictions of the CV index across the standard deviation of the  
851 maximum temperature of the warmest month (sd bio5) for the three developmental classes and  
852 pines species.

853 **References**

854 Fréjaville, T. & Benito Garzón, M. (2018) The EuMedClim Database: Yearly Climate Data  
855 (1901–2014) of 1 km Resolution Grids for Europe and the Mediterranean Basin.

856 *Frontiers in Ecology and Evolution*, **6**, 31.

857 Vizcaíno-Palomar, N., Benito Garzón, M., Alía, R., Giovannelli, G., Huber, G., Mutke, S.,  
858 Pastuszka, P., Raffin, A., Sbay, H., Seho, M., Vauthier, D. & Fady, B. (2019)

859 Geographic variation of tree height of three pine species (*Pinus nigra* Arn., *P. pinaster*  
860 Aiton and *P. pinea* L.) gathered from common gardens in Europe and North-Africa.

861 *Annals of Forest Science*, **accepted**.

862

863
